# Supplementary material for: Quantitative preparation of 3,4-di(methylene)tetrahydrothiophene-1,1-dioxide by Zn-induced 1,4-debromination. A valuable 6-C reactive diene in [4+2] cycloadditions with DMAD and [60]fullerene
Source: Royal Society of Chemistry journal article supplement (doi:10.1039/c2ra22502f), 2012-01-01
Supplement: c2ra22502f.pdf [file c2ra22502f.pdf]

*Electronic Supplementary Information*

*for:*

**Quantitative preparation of 3,4-  
di(methylene)tetrahydrothiophene-1,1-dioxide by Zn-induced  
1,4-debromination. A valuable 6-C reactive diene in [4+2]  
cycloadditions with DMAD and [60]fullerene**

Marios S. Markoulides, Charalambos P. Ioannou, Manolis J. Manos and Nikos Chronakis\*

*Department of Chemistry, University of Cyprus, P.O. Box 20537, 1678, Nicosia, Cyprus.*

*Fax: +357 22 892801; Tel: +357 22 892781;*

*E-mail: [nchronak@ucy.ac.cy](mailto:nchronak@ucy.ac.cy)*

**Table of Contents**

|                                                                                                      |     |
|------------------------------------------------------------------------------------------------------|-----|
| 1. X-ray crystallography                                                                             | S2  |
| 2. <sup>1</sup> H NMR and <sup>13</sup> C NMR spectra                                                | S3  |
| 3. High resolution MALDI-TOF mass spectra of <b>9</b> (negative mode, DCTB)                          | S14 |
| 4. DSC and TGA data for <b>3</b>                                                                     | S16 |
| 5. X-ray crystallographic information (crystal data/structure refinement) for <b>10</b> and <b>3</b> | S18 |
| 6. Crystal packing and interactions in the crystal structure of <b>3</b>                             | S19 |
| 7. Crystal packing and interactions in the crystal structure of <b>10</b>                            | S19 |
| 8. References                                                                                        | S20 |

## 1. X-ray Crystallography

Crystallographic data were collected on an Oxford-Diffraction Supernova diffractometer, equipped with a CCD area detector utilizing Mo-K $\alpha$  radiation ( $\lambda = 0.71073 \text{ \AA}$ ). A suitable crystal was attached to glass fibers using paratone-N oil and transferred to a goniostat where they were cooled for data collection. Empirical absorption corrections (multi-scan based on symmetry-related measurements) were applied using CrysAlis RED software.<sup>1</sup> The structures were solved by direct methods using SIR92<sup>2</sup> and refined on F<sup>2</sup> using full-matrix least squares using SHELXL97.<sup>3</sup> Software packages used: CrysAlis CCD<sup>1</sup> for data collection, CrysAlis RED<sup>1</sup> for cell refinement and data reduction, WINGX for geometric calculations<sup>4</sup> and MERCURY<sup>5</sup> for molecular graphics. The non-H atoms were treated anisotropically. The hydrogen atoms were placed in calculated, ideal positions and refined as riding on their respective carbon atoms. Selected crystallographic data for compounds **3** and **10** are shown in Table S1. CCDC 868567 and 868568 contain the supplementary crystallographic data for this paper. These data can be obtained free of charge via [www.ccdc.cam.ac.uk/data\\_request/cif](http://www.ccdc.cam.ac.uk/data_request/cif).

## 2. $^1\text{H}$ NMR and $^{13}\text{C}$ NMR spectra

### $^1\text{H}$ NMR spectrum of 7 (300 MHz, $\text{CDCl}_3$ )

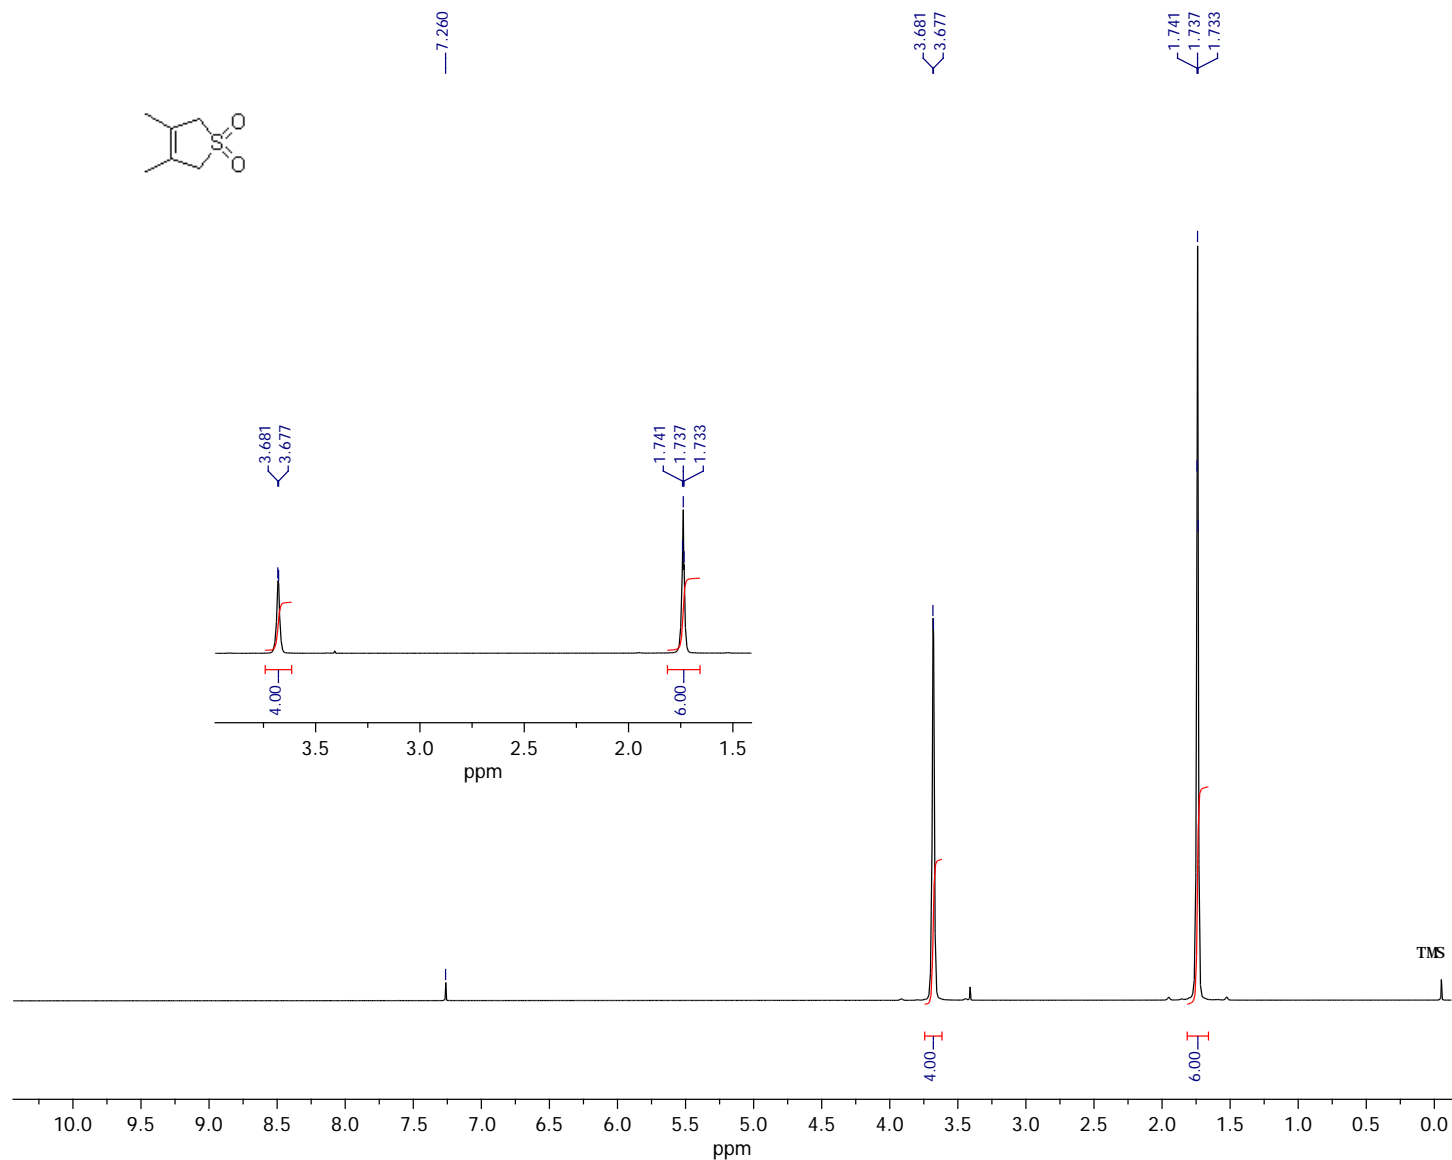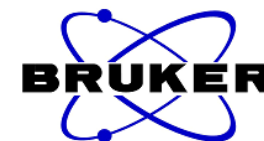

Current Data Parameters  
NAME MSM  
EXPNO 42  
PROCNO 1

F2 - Acquisition Parameters  
INSTRUM spect  
PROBHD 5 mm PABBO BB-  
PULPROG zg30  
TD 65536  
SOLVENT  $\text{CDCl}_3$   
NS 16  
DS 2  
SWH 6172.839 Hz  
FIDRES 0.094190 Hz  
AQ 5.3084660 sec  
RG 64  
DW 81.000 usec  
DE 9.00 usec  
TE 293.2 K  
D1 1.00000000 sec  
TDO 1

===== CHANNEL f1 =====  
NUC1  $^1\text{H}$   
P1 9.40 usec  
PL1 0.00 dB  
SF01 300.1318534 MHz

F1 - Acquisition parameters  
NDO 2  
TD 256  
SF01 300.1314 MHz  
FIDRES 12.056327 Hz  
SW 10.284 ppm  
FrMODE undefined

F2 - Processing parameters  
SI 32768  
SF 300.1300059 MHz  
WDW EM  
SSB 0  
LB 0.30 Hz  
GB 0  
PC 1.00

F1 - Processing parameters  
SI 1024  
MC2 QF  
SF 300.1300000 MHz  
WDW SINE  
SSB 0  
LB 0.30 Hz  
GB 0.1

# <sup>13</sup>C NMR spectrum of 7 (75 MHz, CDCl<sub>3</sub>)

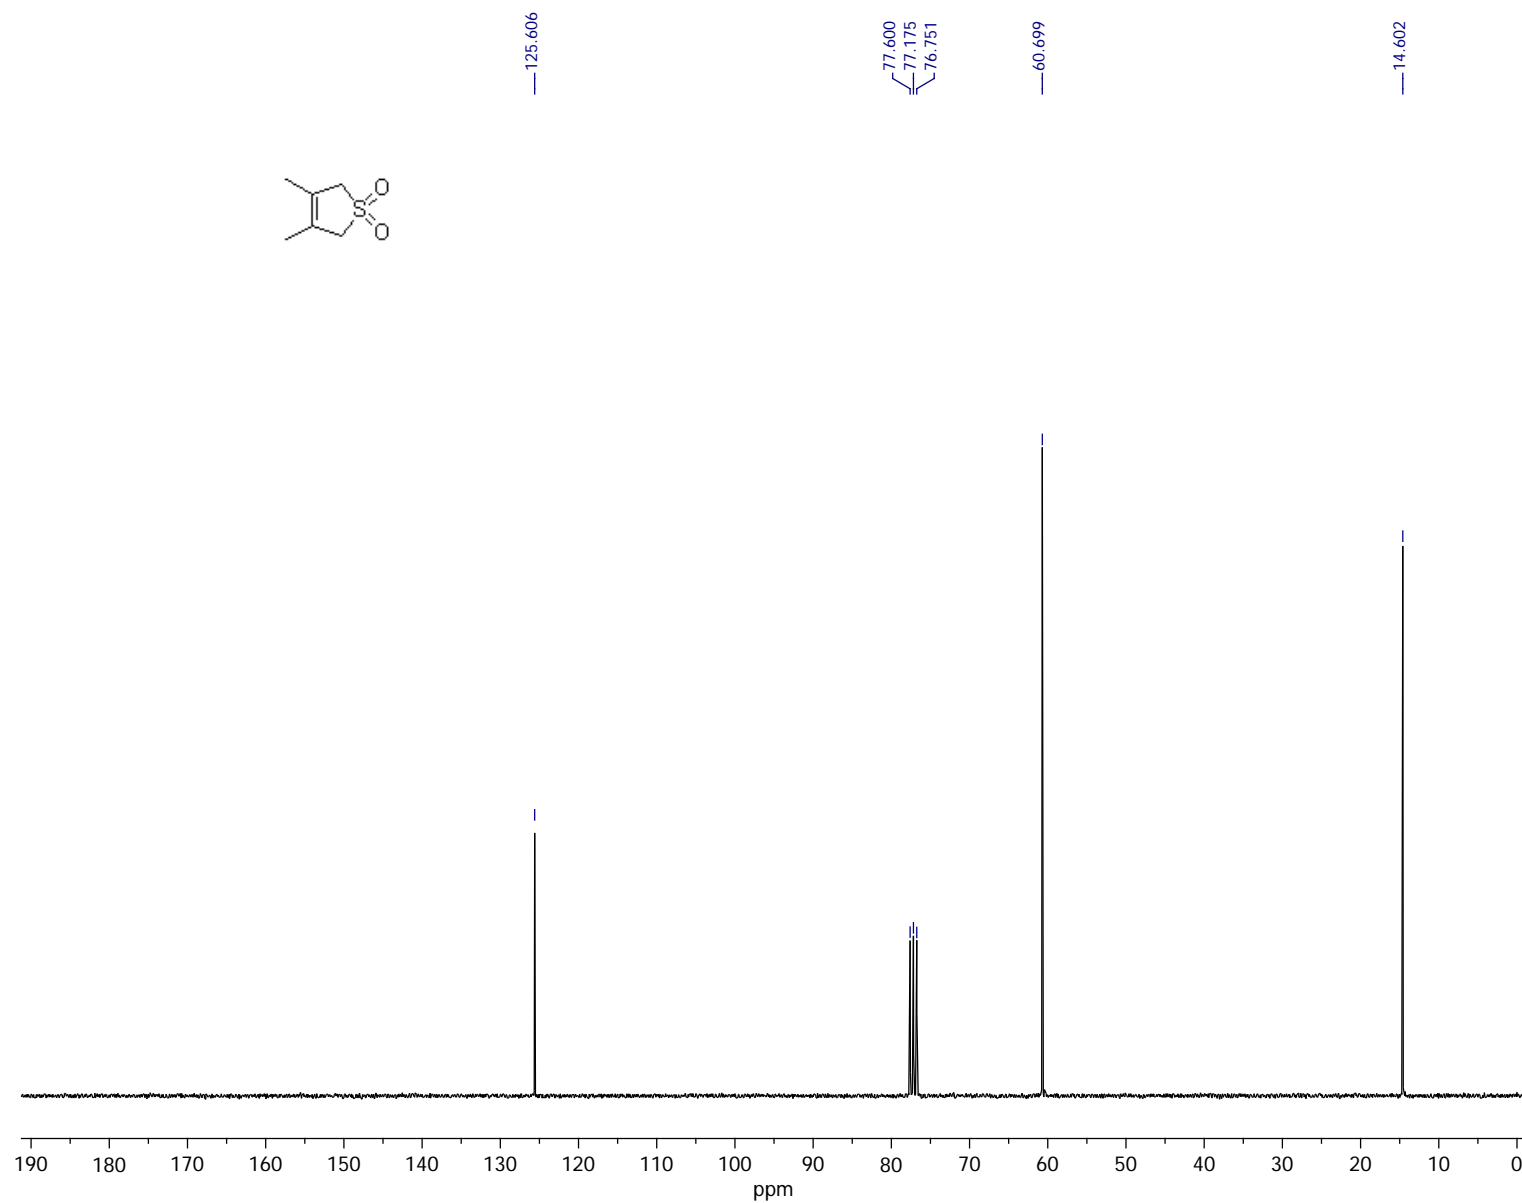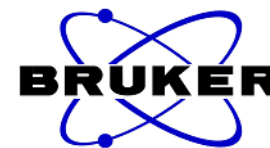

Current Data Parameters  
NAME MSM  
EXPNO 43  
PROCNO 1

F2 - Acquisition Parameters  
INSTRUM spect  
PROBHD 5 mm PABBO BB-  
PULPROG zgpg30  
TD 65536  
SOLVENT CDCl3  
NS 212  
DS 4  
SWH 17985.611 Hz  
FIDRES 0.274439 Hz  
AQ 1.8219508 sec  
RG 4597.6  
DW 27.800 usec  
DE 6.00 usec  
TE 294.2 K  
D1 2.0000000 sec  
d11 0.0300000 sec  
DELTA 1.8999998 sec  
TDO 1

===== CHANNEL f1 =====  
NUC1 13C  
P1 7.95 usec  
PL1 -2.00 dB  
SF01 75.4752953 MHz

===== CHANNEL f2 =====  
CPDPRG2 waltz16  
NUC2 1H  
PCPD2 110.00 usec  
PL2 0.00 dB  
PL12 22.00 dB  
PL13 24.00 dB  
SF02 300.1312005 MHz

F2 - Processing parameters  
SI 32768  
SF 75.4677490 MHz  
WDW EM  
SSB 0  
LB 1.00 Hz  
GB 0  
PC 1.40

# <sup>1</sup>H NMR spectrum of 3 (300 MHz, CDCl<sub>3</sub>)

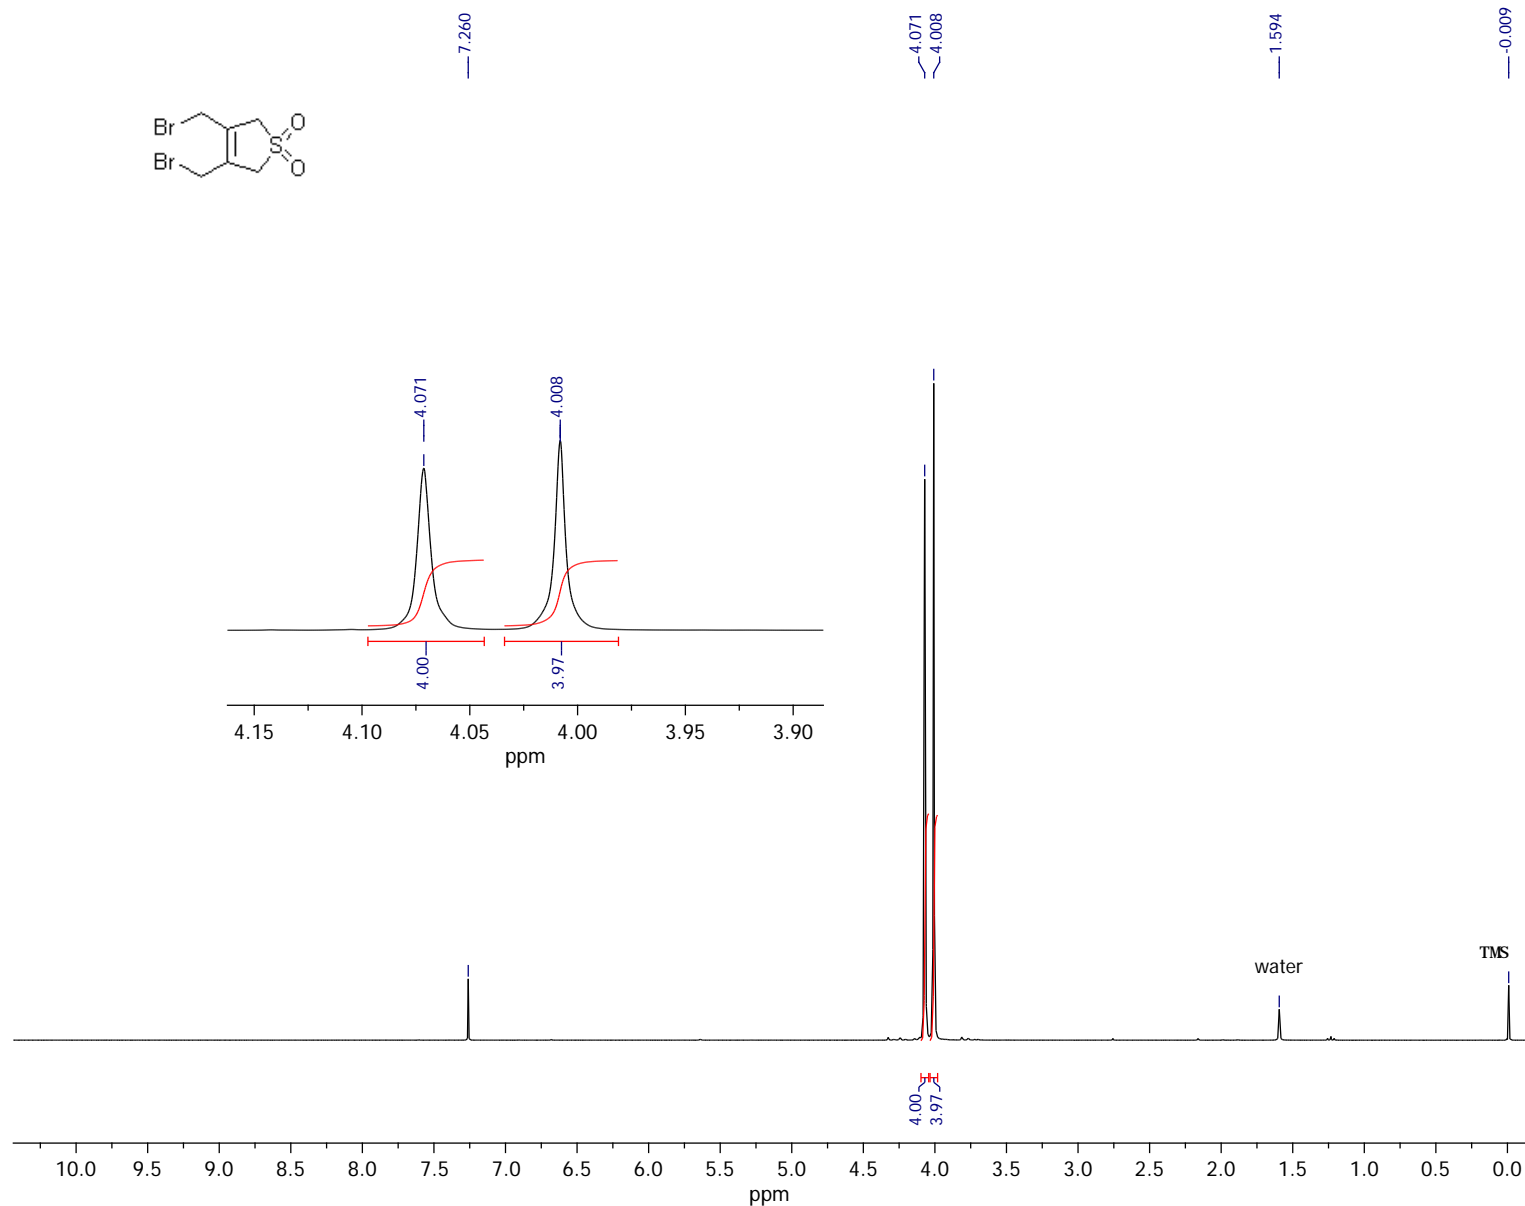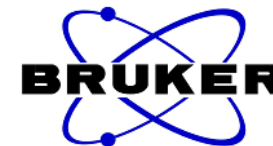

Current Data Parameters  
NAME MSM  
EXPNO 60  
PROCNO 1

F2 - Acquisition Parameters  
INSTRUM spect  
PROBHD 5 mm PABBO BB-  
PULPROG zg30  
TD 65536  
SOLVENT CDCl3  
NS 32  
DS 2  
SWH 6172.839 Hz  
FIDRES 0.094190 Hz  
AQ 5.3084660 sec  
RG 287.4  
DW 81.000 usec  
DE 9.00 usec  
TE 299.2 K  
D1 1.0000000 sec  
TDO 1

----- CHANNEL f1 -----  
NUC1 1H  
P1 9.40 usec  
PL1 0.00 dB  
SF01 300.1318534 MHz

F1 - Acquisition parameters  
NDO 2  
TD 256  
SF01 300.1314 MHz  
FIDRES 12.056327 Hz  
SW 10.284 ppm  
FnMODE undefined

F2 - Processing parameters  
SI 32768  
SF 300.130061 MHz  
WDW EM  
SSB 0  
LB 0.30 Hz  
GB 0  
PC 1.00

F1 - Processing parameters  
SI 1024  
MC2 QF  
SF 300.130000 MHz  
WDW SINE  
SSB 0  
LB 0.30 Hz  
GB 0.1

### <sup>13</sup>C NMR spectrum of 3 (75 MHz, CDCl<sub>3</sub>)

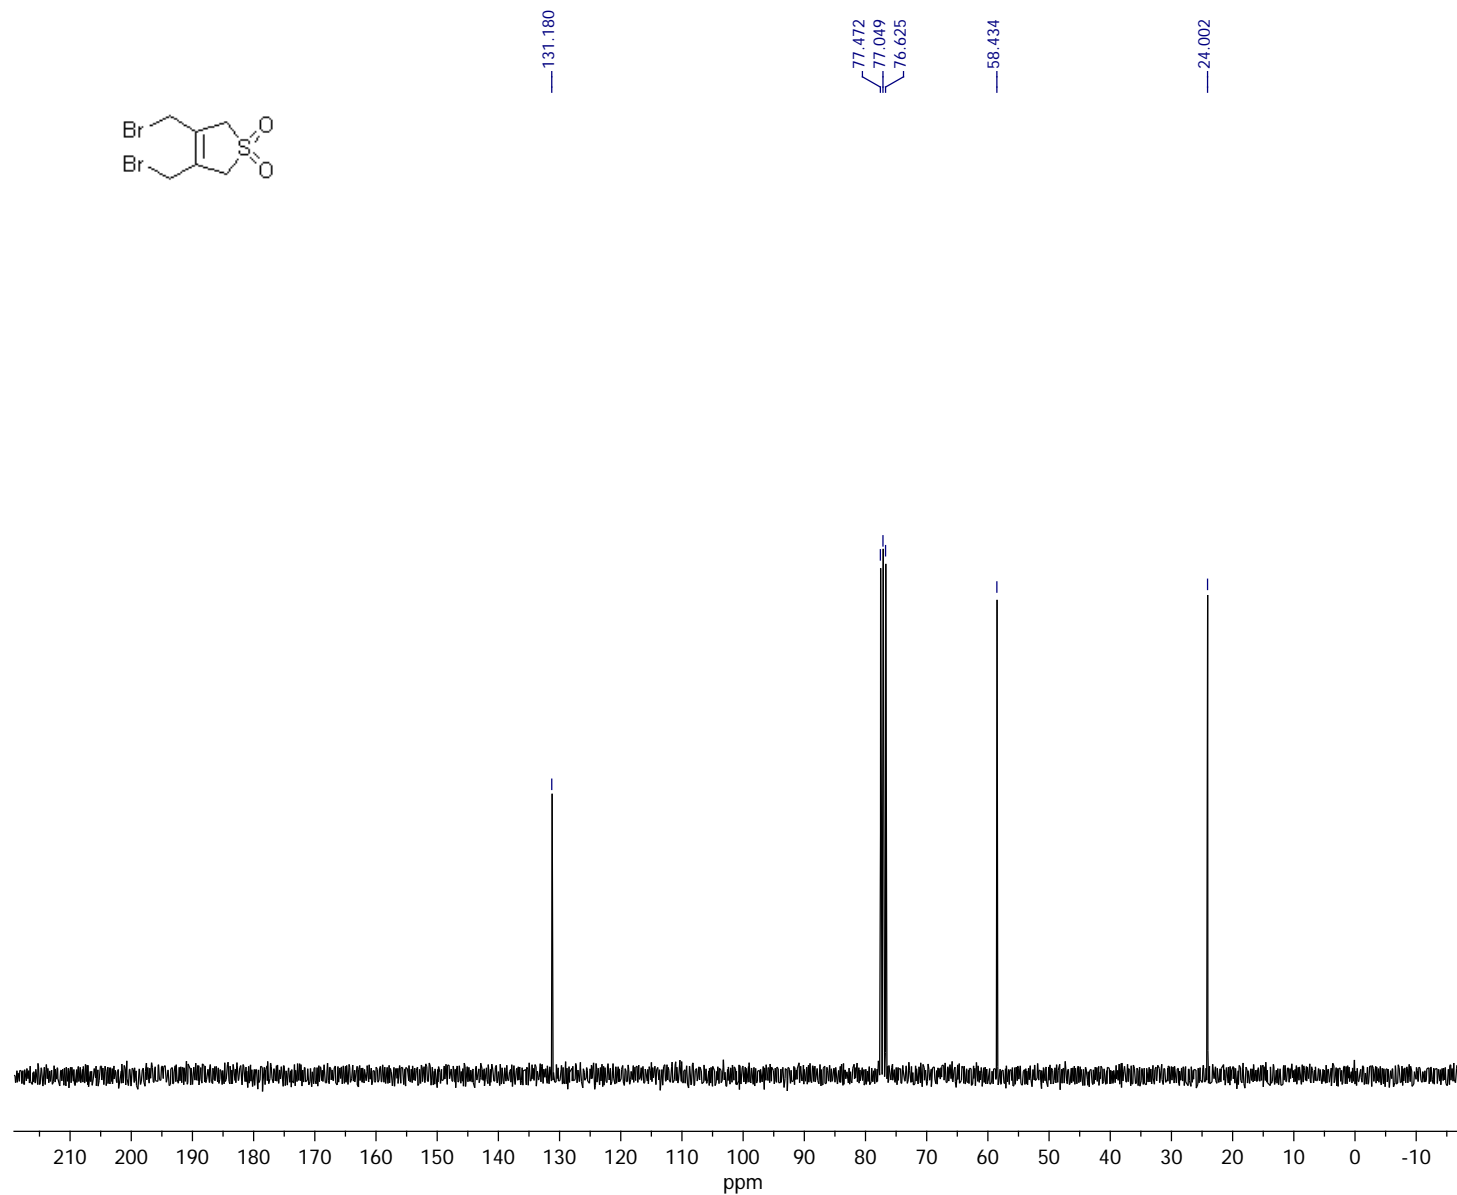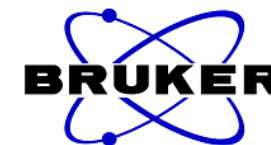

Current Data Parameters  
NAME MSM  
EXPNO 61  
PROCNO 1

F2 - Acquisition Parameters  
INSTRUM spect  
PROBHD 5 mm PABBO BB-  
PULPROG zgpg30  
TD 65536  
SOLVENT CDCl3  
NS 131  
DS 4  
SWH 17985.611 Hz  
FIDRES 0.274439 Hz  
AQ 1.8219508 sec  
RG 18390.4  
DW 27.800 usec  
DE 6.00 usec  
TE 299.2 K  
D1 2.0000000 sec  
d11 0.0300000 sec  
DELTA 1.8999998 sec  
TDO 1

===== CHANNEL f1 =====  
NUC1 13C  
P1 7.95 usec  
PL1 -2.00 dB  
SF01 75.4752953 MHz

===== CHANNEL f2 =====  
CPDPRG2 wal tz16  
NUC2 1H  
PCPD2 110.00 usec  
PL2 0.00 dB  
PL12 22.00 dB  
PL13 24.00 dB  
SF02 300.1312005 MHz

F2 - Processing parameters  
SI 32768  
SF 75.4677490 MHz  
WDW EM  
SSB 0  
LB 1.00 Hz  
GB 0  
PC 1.40

**<sup>1</sup>H NMR spectrum of the reaction of 3 (1 equiv) with Zn-dust (2.3 equiv) in the presence of mesitylene (1 equiv): beginning (top), upon completion (bottom) (500 MHz, acetone-*d*<sub>6</sub>)**

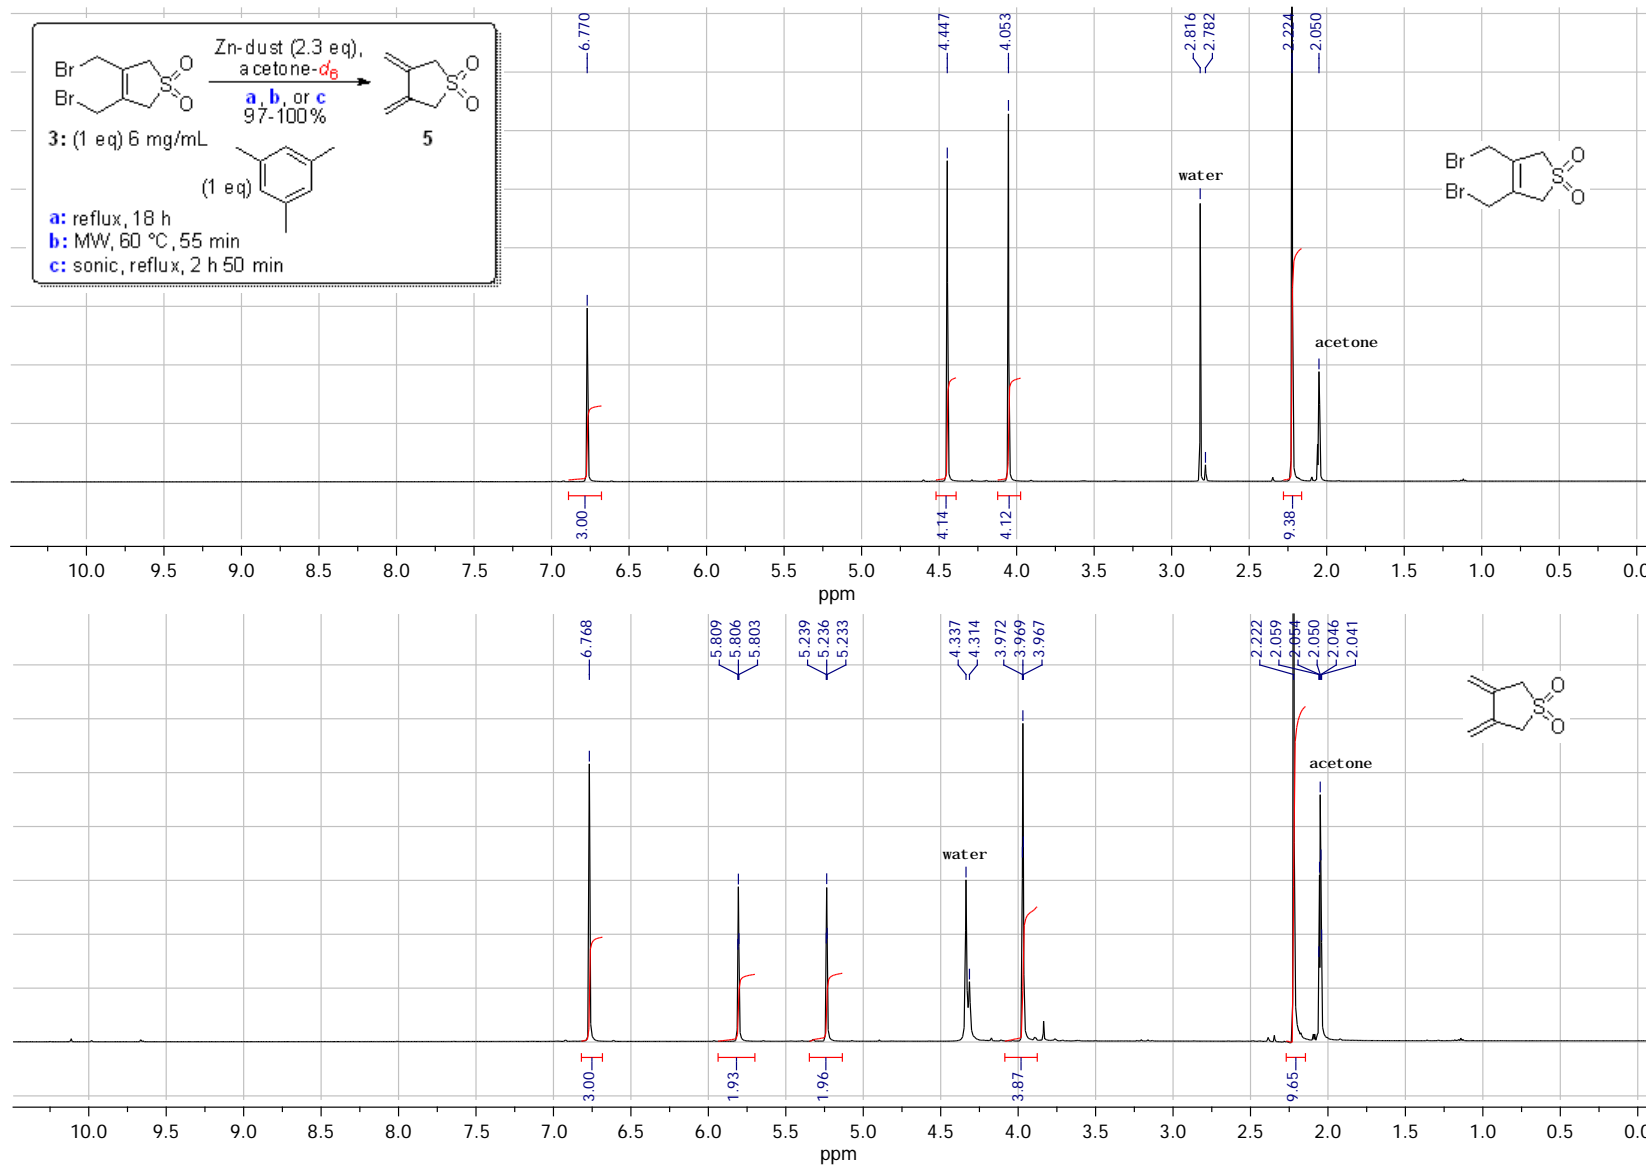

# <sup>1</sup>H NMR spectrum of 5 (300 MHz, acetone-d<sub>6</sub>)

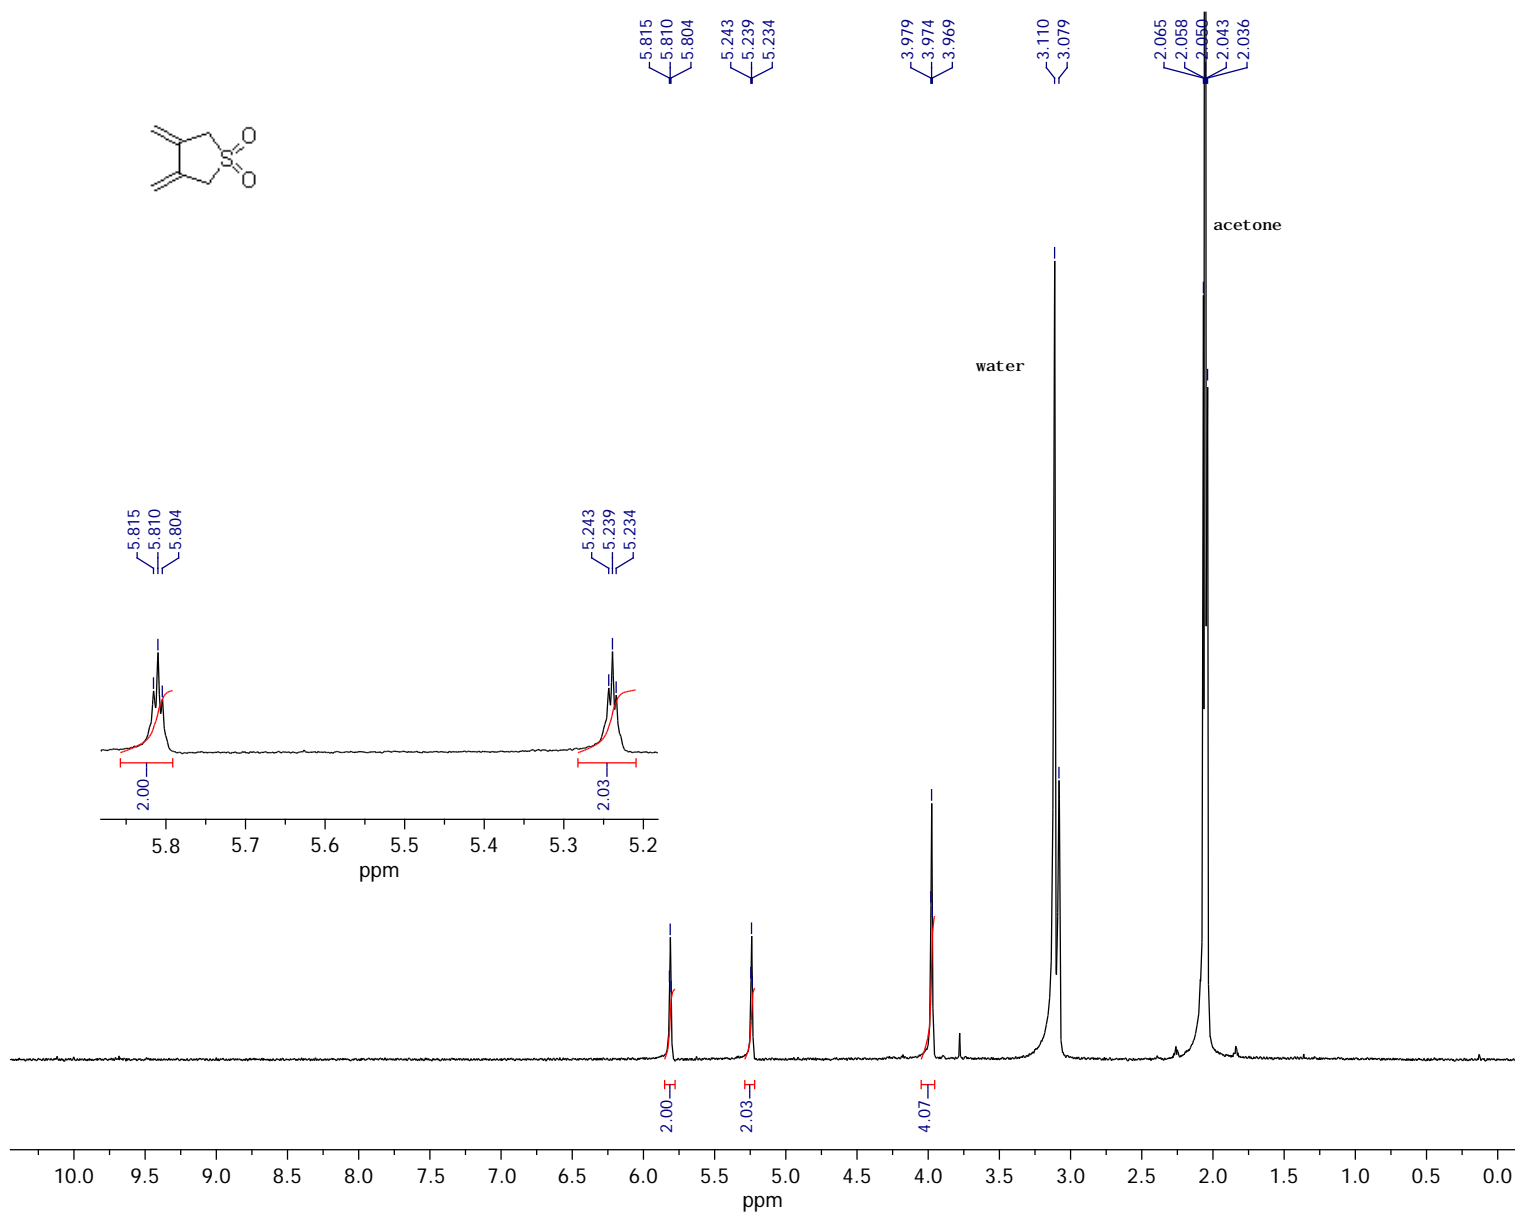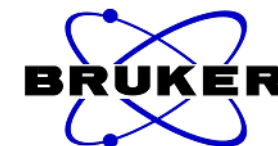

Current Data Parameters  
NAME MSM  
EXPNO 170  
PROCNO 1

F2 - Acquisition Parameters  
INSTRUM spect  
PROBHD 5 mm PABBO BB-  
PULPROG zg30  
TD 65536  
SOLVENT Acetone  
NS 25  
DS 2  
SWH 6172.839 Hz  
FIDRES 0.094190 Hz  
AQ 5.3084660 sec  
RG 512  
DW 81.000 usec  
DE 9.00 usec  
TE 294.2 K  
D1 1.0000000 sec  
TD0 1

===== CHANNEL f1 =====  
NUC1 1H  
P1 9.40 usec  
PL1 0.00 dB  
SF01 300.1318534 MHz

F1 - Acquisition parameters  
ND0 2  
TD 256  
SF01 300.1314 MHz  
FIDRES 12.056327 Hz  
SW 10.284 ppm  
FIDMODE undefined

F2 - Processing parameters  
SI 32768  
SF 300.1300040 MHz  
WDW EM  
SSB 0  
LB 0.30 Hz  
GB 0  
PC 1.00

F1 - Processing parameters  
SI 1024  
MC2 QF  
SF 300.1300000 MHz  
WDW SINE  
SSB 0  
LB 0.30 Hz  
GB 0.1



# <sup>13</sup>C NMR spectrum of 5 (75 MHz, acetone-d<sub>6</sub>)

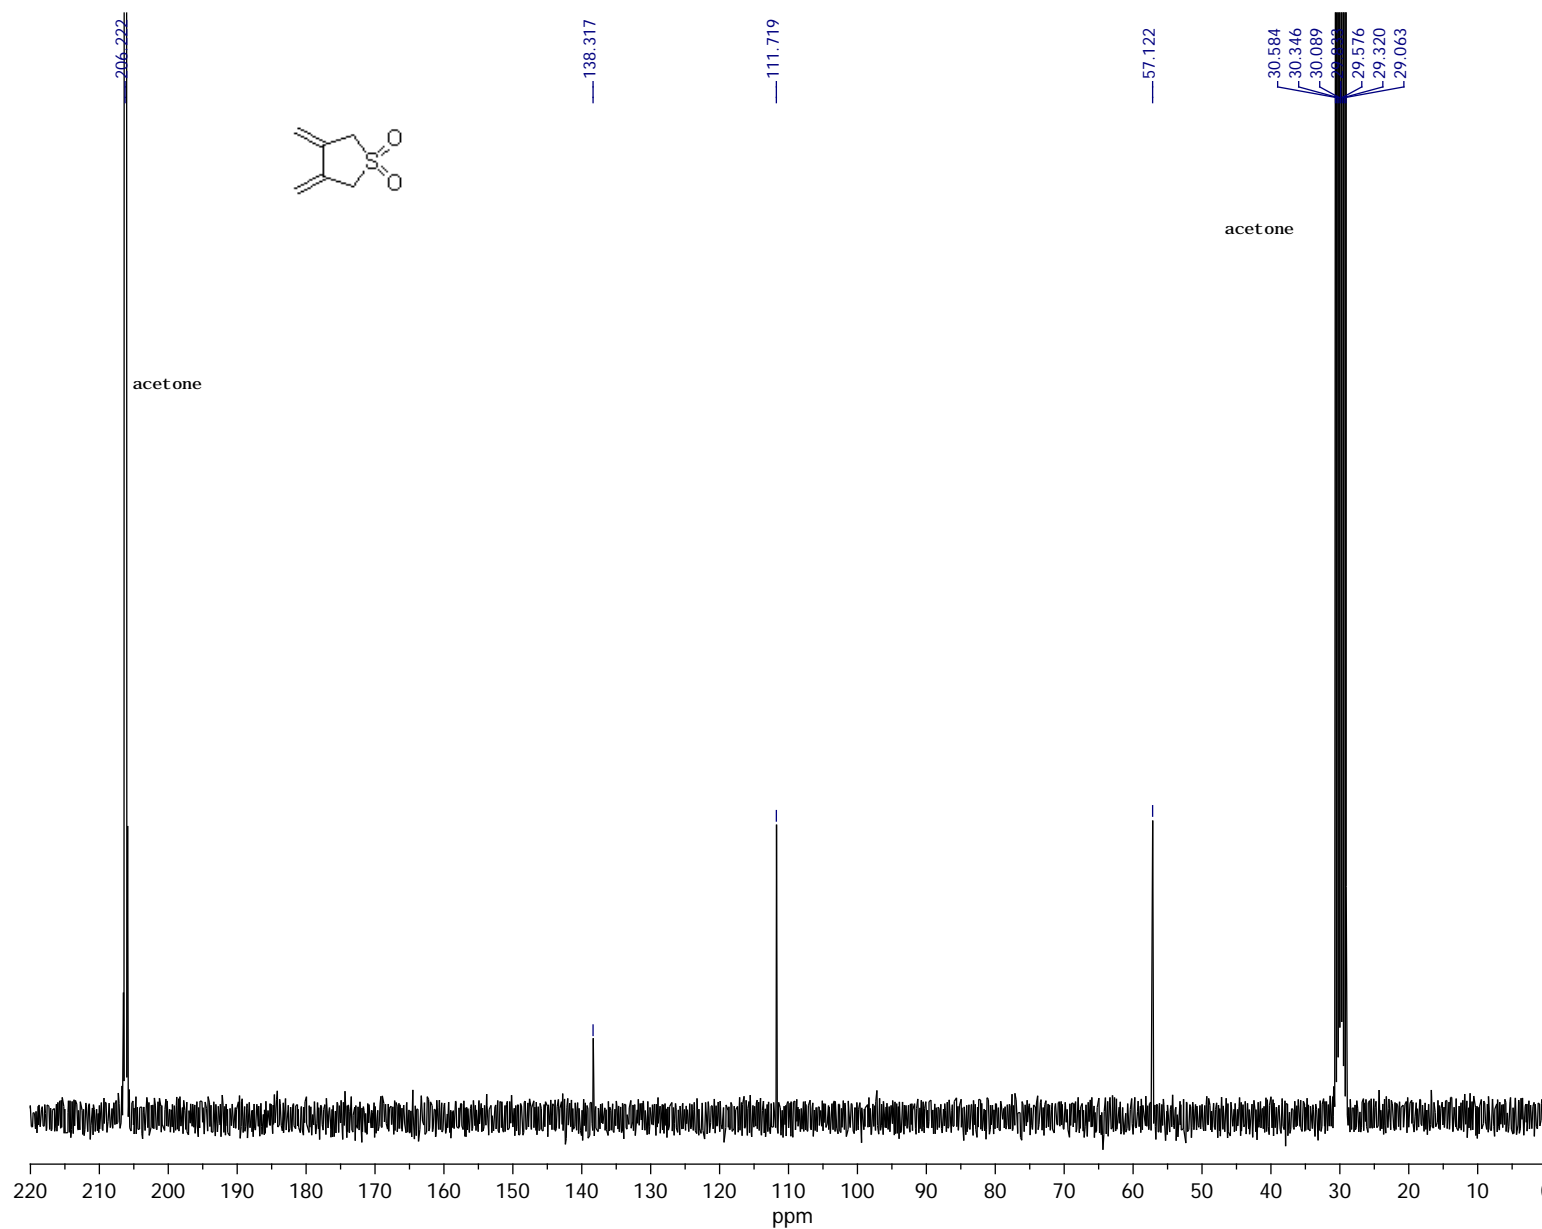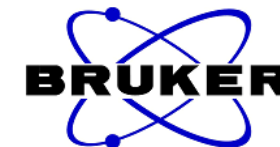

### Current Data Parameters

NAME MSM  
EXPNO 176  
PROCNO 1

### F2 - Acquisition Parameters

INSTRUM spect  
PROBHD 5 mm PABBO BB-  
PULPROG zgpg30  
TD 65536  
SOLVENT Acetone  
NS 1087  
DS 4  
SWH 17985.611 Hz  
FIDRES 0.274439 Hz  
AQ 1.8219508 sec  
RG 5792.6  
DW 27.800 usec  
DE 6.00 usec  
TE 294.2 K  
D1 2.0000000 sec  
d11 0.0300000 sec  
DELTA 1.89999998 sec  
TDO 1

===== CHANNEL f1 =====  
NUC1 13C  
P1 7.95 usec  
PL1 -2.00 dB  
SFO1 75.4752953 Mhz

===== CHANNEL f2 =====  
CPDPRG2 wal tz16  
NUC2 1H  
PCPD2 110.00 usec  
PL2 0.00 dB  
PL12 22.00 dB  
PL13 24.00 dB  
SFO2 300.1312005 Mhz

F2 - Processing parameters  
SI 32768  
SF 75.4676830 Mhz  
WDW EM  
SSB 0  
LB 1.00 Hz  
GB 0  
PC 1.40

# <sup>1</sup>H NMR spectrum of 9 (300 MHz, CS<sub>2</sub>/CDCl<sub>3</sub>, 1:1)

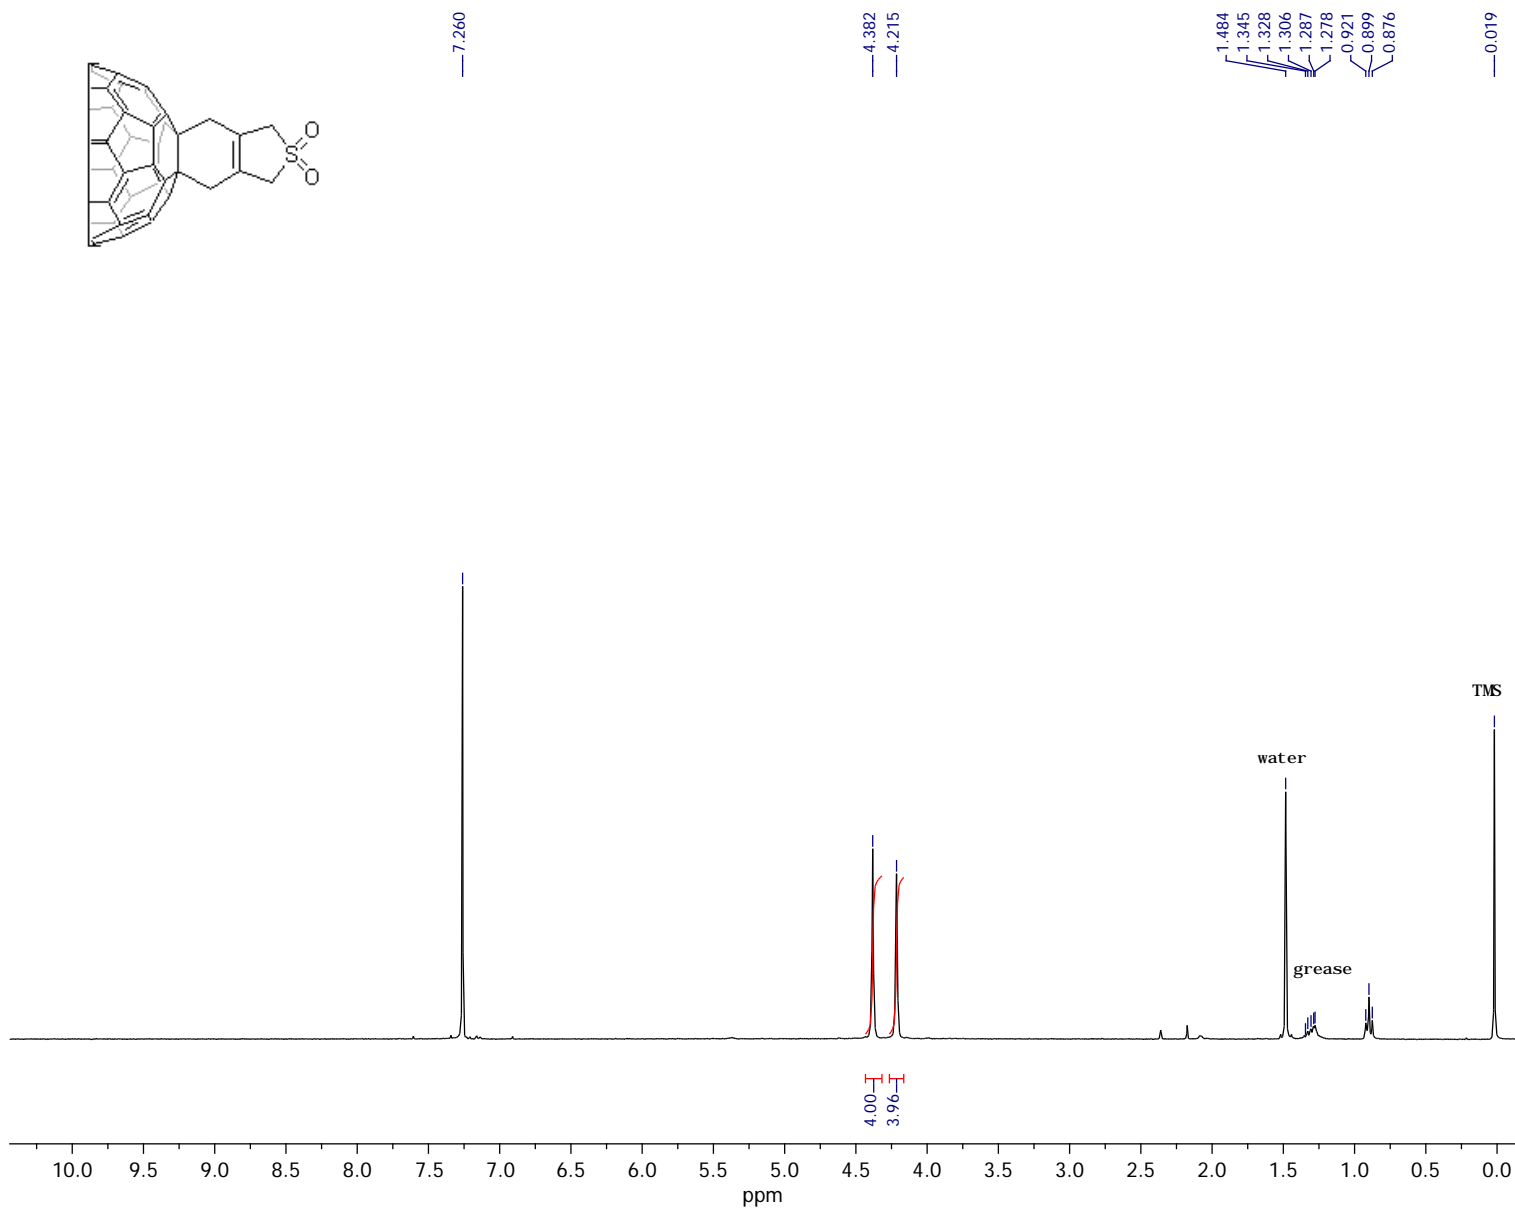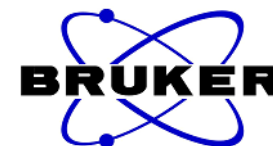

Current Data Parameters  
NAME MSM  
EXPNO 190  
PROCNO 1

F2 - Acquisition Parameters  
INSTRUM spect  
PROBHD 5 mm PABBO BB-  
PULPROG zg30  
TD 65536  
SOLVENT CDCl3  
NS 44  
DS 2  
SWH 6172.839 Hz  
FIDRES 0.094190 Hz  
AQ 5.3084660 sec  
RG 512  
DW 81.000 usec  
DE 9.00 usec  
TE 297.2 K  
D1 1.0000000 sec  
TDO 1

===== CHANNEL f1 =====  
NUC1 1H  
P1 9.40 usec  
PL1 0.00 dB  
SF01 300.1318534 MHz

F1 - Acquisition parameters  
ND0 2  
TD 256  
SF01 300.1314 MHz  
FIDRES 12.056327 Hz  
SW 10.284 ppm  
FinMODE undefined

F2 - Processing parameters  
SI 32768  
SF 300.1300063 MHz  
WDW EM  
SSB 0  
LB 0.30 Hz  
GB 0  
PC 1.00

F1 - Processing parameters  
SI 1024  
MC2 QF  
SF 300.1300000 MHz  
WDW SINE  
SSB 0  
LB 0.30 Hz  
GB 0.1

<sup>13</sup>C NMR spectrum of 9 (75 MHz, CS<sub>2</sub>/CDCl<sub>3</sub>, 1:1)

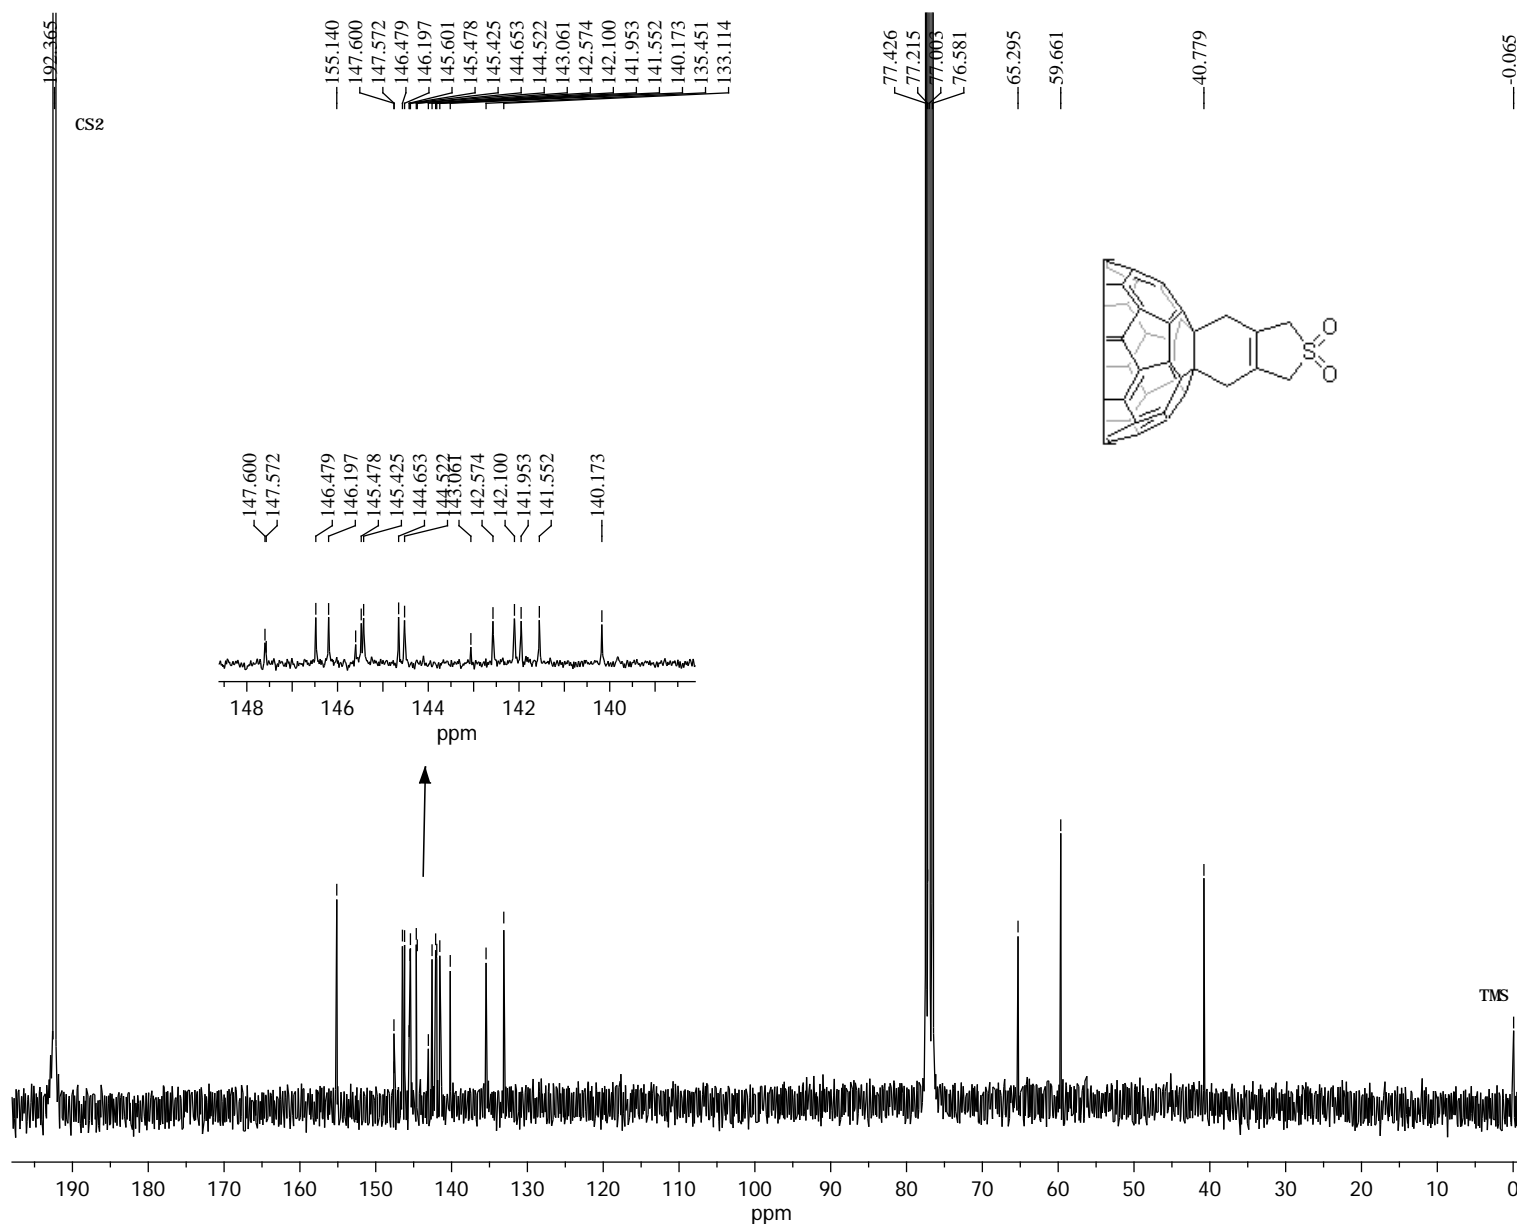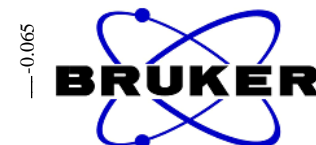

Current Data Parameters  
NAME MSM  
EXPNO 196  
PROCNO 1

F2 - Acquisition Parameters  
INSTRUM spect  
PROBHD 5 mm PABBO BB-  
PULPROG zgpg30  
TD 65536  
SOLVENT CDCl3  
NS 12288  
DS 4  
SWH 17985.611 Hz  
FIDRES 0.274439 Hz  
AQ 1.8219508 sec  
RG 8192  
DW 27.800 usec  
DE 6.00 usec  
TE 296.2 K  
D1 2.00000000 sec  
d11 0.03000000 sec  
DELTA 1.89999998 sec  
TDO 1

===== CHANNEL f1 =====  
NUC1 13C  
P1 7.95 usec  
PL1 -2.00 dB  
SF01 75.4752953 MHz

===== CHANNEL f2 =====  
CPDPRG2 wal tz16  
NUC2 1H  
PCPD2 110.00 usec  
PL2 0.00 dB  
PL12 22.00 dB  
PL13 24.00 dB  
SF02 300.1312005 MHz

F2 - Processing parameters  
SI 32768  
SF 75.4677656 MHz  
WDW EM  
SSB 0  
LB 1.00 Hz  
GB 0  
PC 1.40

# <sup>1</sup>H NMR spectrum of 10 (500 MHz, CDCl<sub>3</sub>)

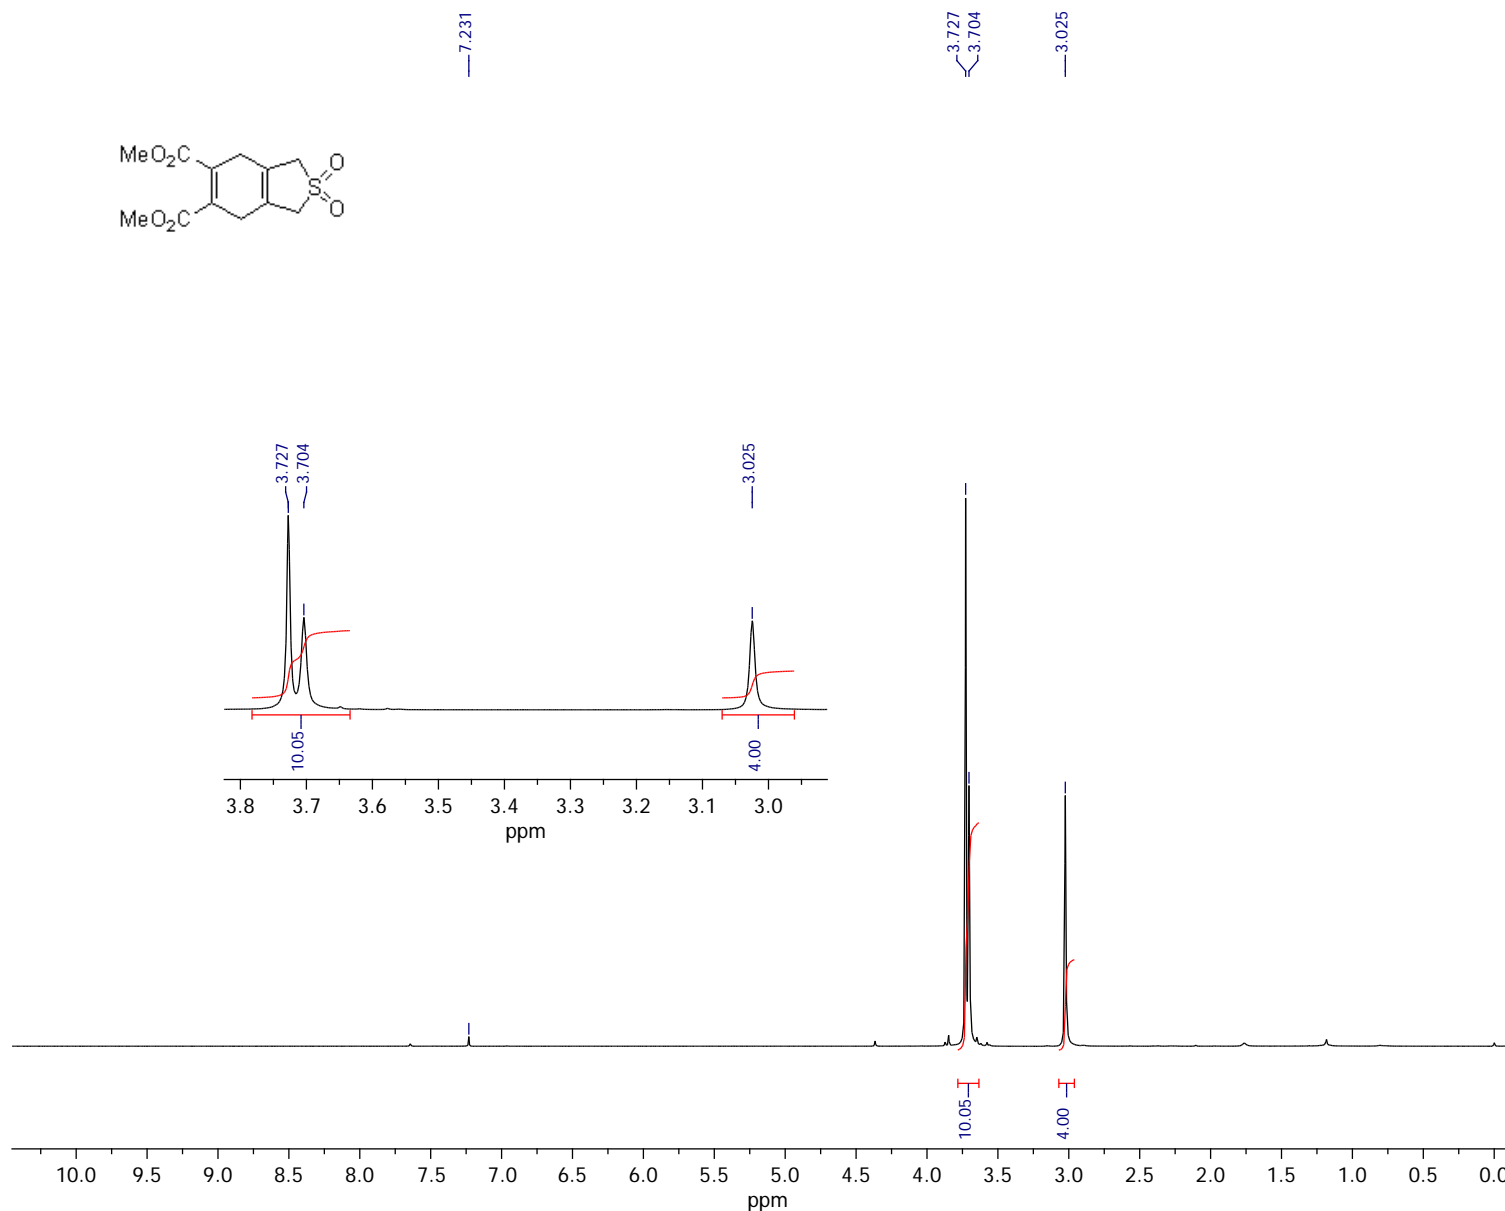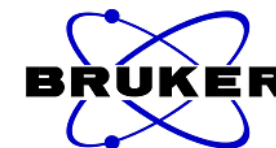

### Current Data Parameters

NAME MSM  
EXPNO 139  
PROCNO 1

### F2 - Acquisition Parameters

INSTRUM spect  
PROBHD 5 mm PABBO BB-  
PULPROG zg30  
TD 65536  
SOLVENT CDCl3  
NS 16  
DS 2  
SWH 10330.578 Hz  
FIDRES 0.157632 Hz  
AQ 3.1719923 sec  
RG 32  
DW 48.400 usec  
DE 6.50 usec  
TE 295.7 K  
D1 1.0000000 sec

### ===== CHANNEL f1 =====

NUC1 1H  
P1 11.00 usec  
PLW1 15.41699982 W  
SFO1 500.0361158 MHz

### F2 - Processing parameters

SI 65536  
SF 500.030544 MHz  
WDW EM  
SSB 0  
LB 0.30 Hz  
GB 0  
PC 1.00

### <sup>13</sup>C NMR spectrum of 10 (125 MHz, CDCl<sub>3</sub>)

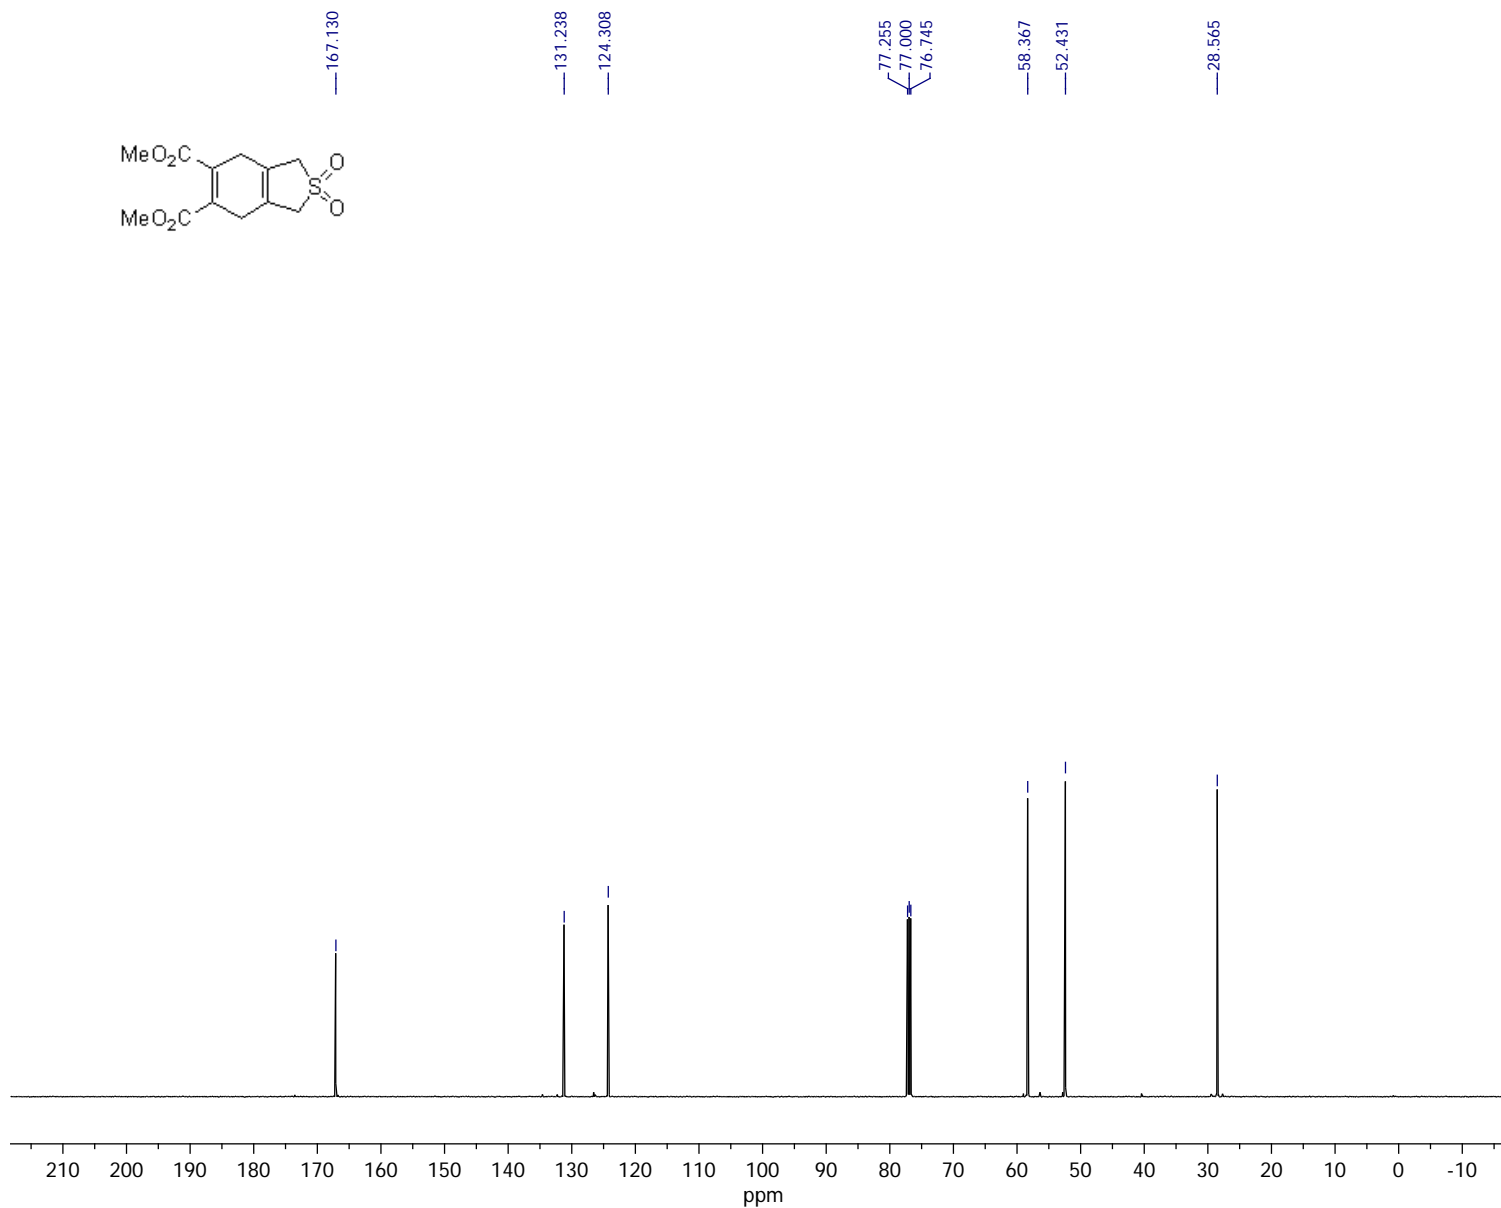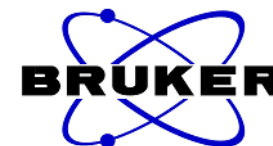

Current Data Parameters  
NAME MSM  
EXPNO 140  
PROCNO 1

F2 - Acquisition Parameters  
INSTRUM spect  
PROBHD 5 mm PABBO BB-  
PULPROG zgpg30  
TD 65536  
SOLVENT CDCl3  
NS 2048  
DS 4  
SWH 29761.904 Hz  
FIDRES 0.454131 Hz  
AQ 1.1010548 sec  
RG 2050  
DW 16.800 usec  
DE 6.50 usec  
TE 296.5 K  
D1 2.0000000 sec  
D11 0.0300000 sec

===== CHANNEL f1 =====  
NUC1 13C  
P1 8.00 usec  
PLW1 138.0000000 W  
SF01 125.7459776 MHz

===== CHANNEL f2 =====  
CPDPRG2 waltz16  
NUC2 1H  
PCPD2 80.00 usec  
PLM2 13.0000000 W  
PLM12 0.31738001 W  
PLM13 0.20313001 W  
SF02 500.0350280 MHz

F2 - Processing parameters  
SI 32768  
SF 125.7334220 MHz  
WDW EM  
SSB 0  
LB 1.00 Hz  
GB 0  
PC 1.40

### 3. High resolution MALDI-TOF mass spectra of 9 (negative mode, DCTB)

D:\Data\Chronakis\MSM\119 (DCTB) negative 2nd time\0\_H5\1\1Ref

Comment 1 119 (DCTB) negative 2nd time

Comment 2

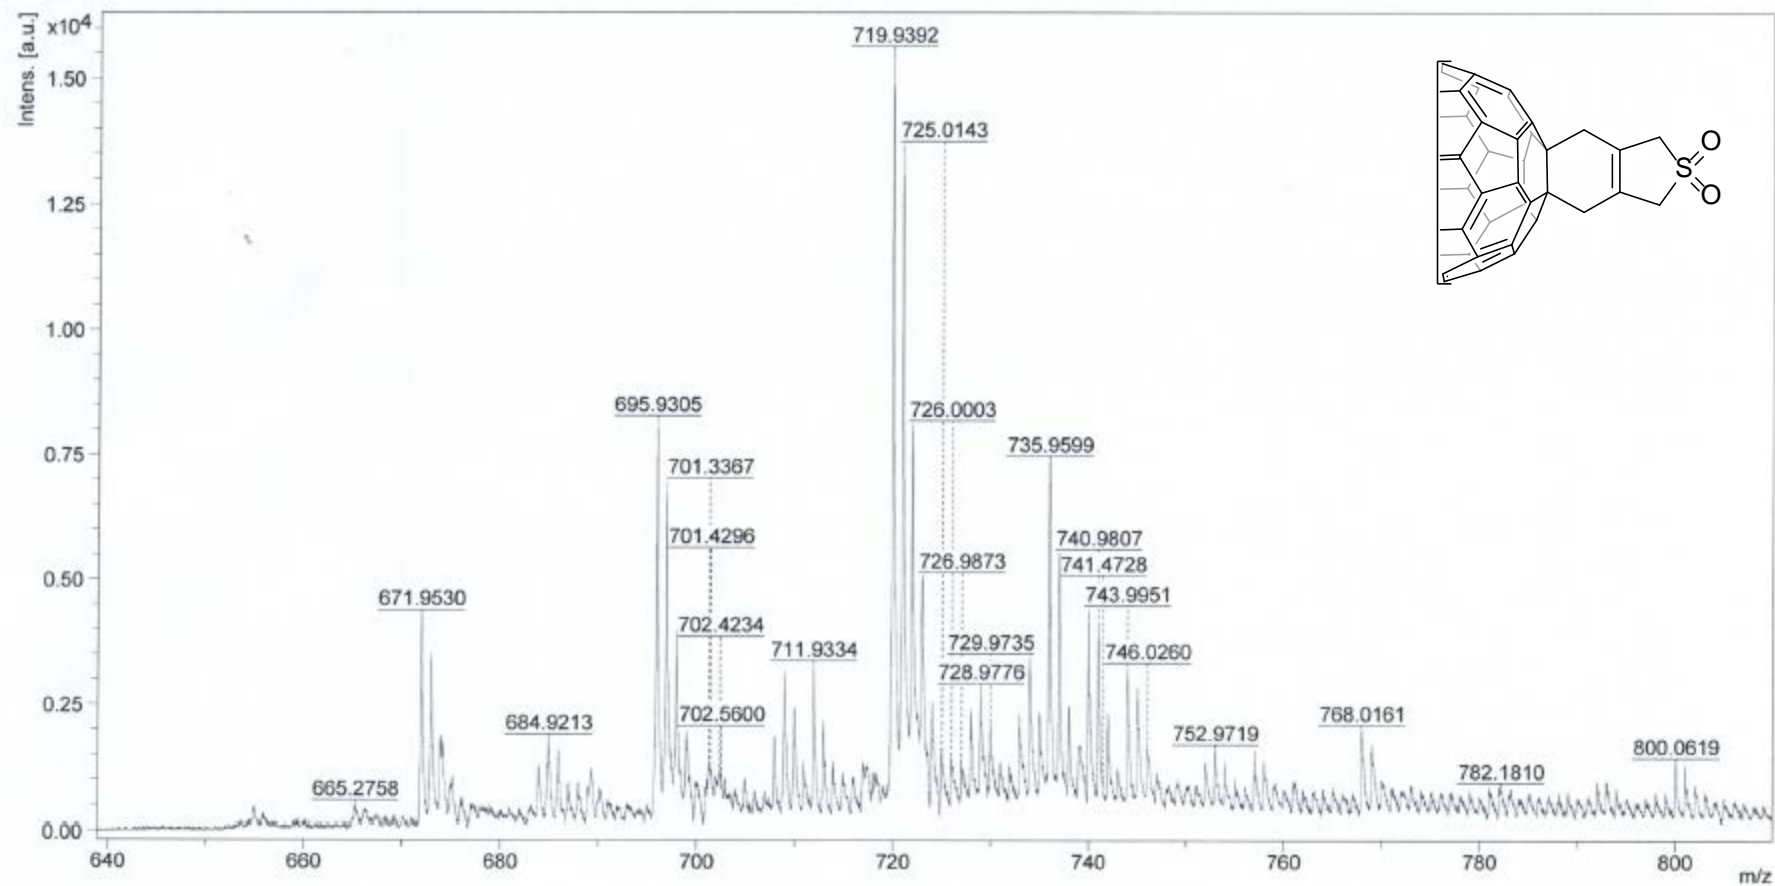

Bruker Daltonics flexAnalysis

printed: 10/9/2012 4:54:29 PM

### High resolution MALDI-TOF mass spectra of 9 (negative mode, DCTB)

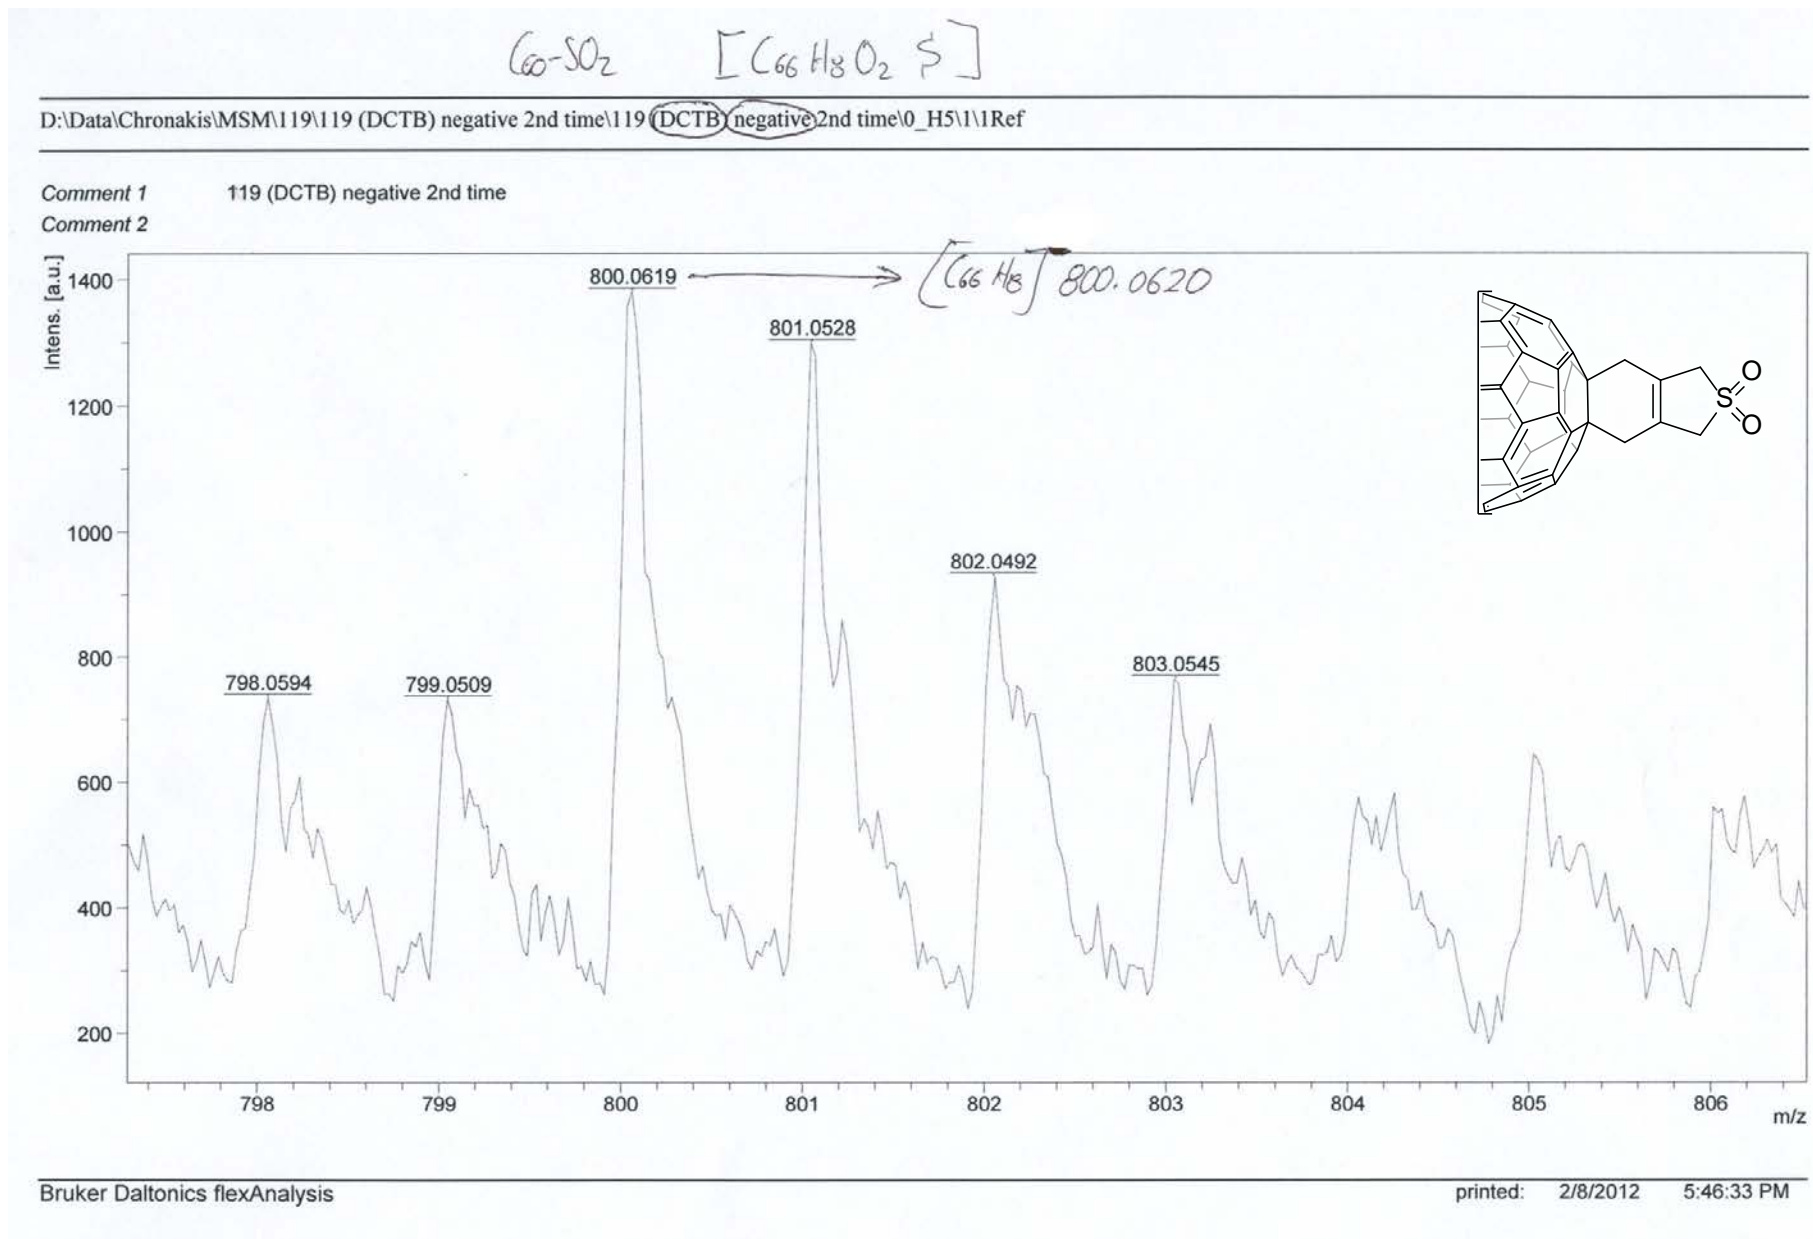

#### 4. DSC and TGA data for 3

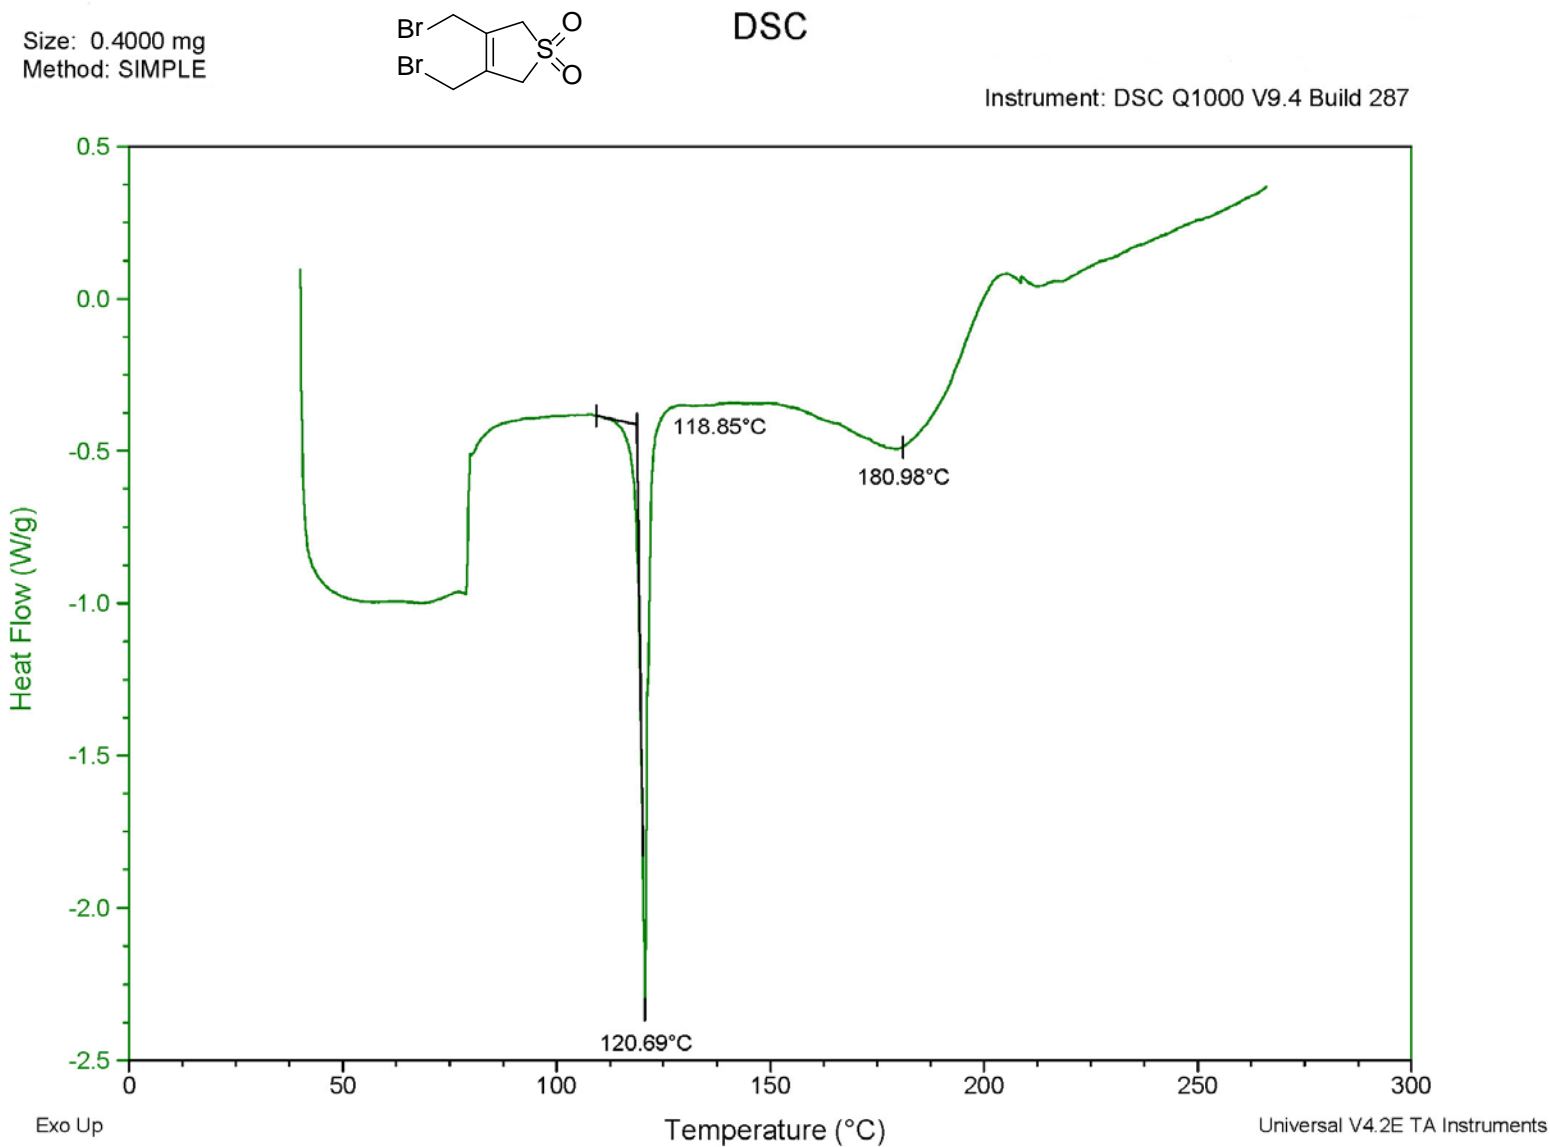



Size: 9.8210 mg  
Method: Ramp

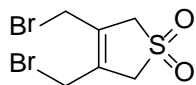

TGA

Instrument: TGA Q500 V6.4 Build 193

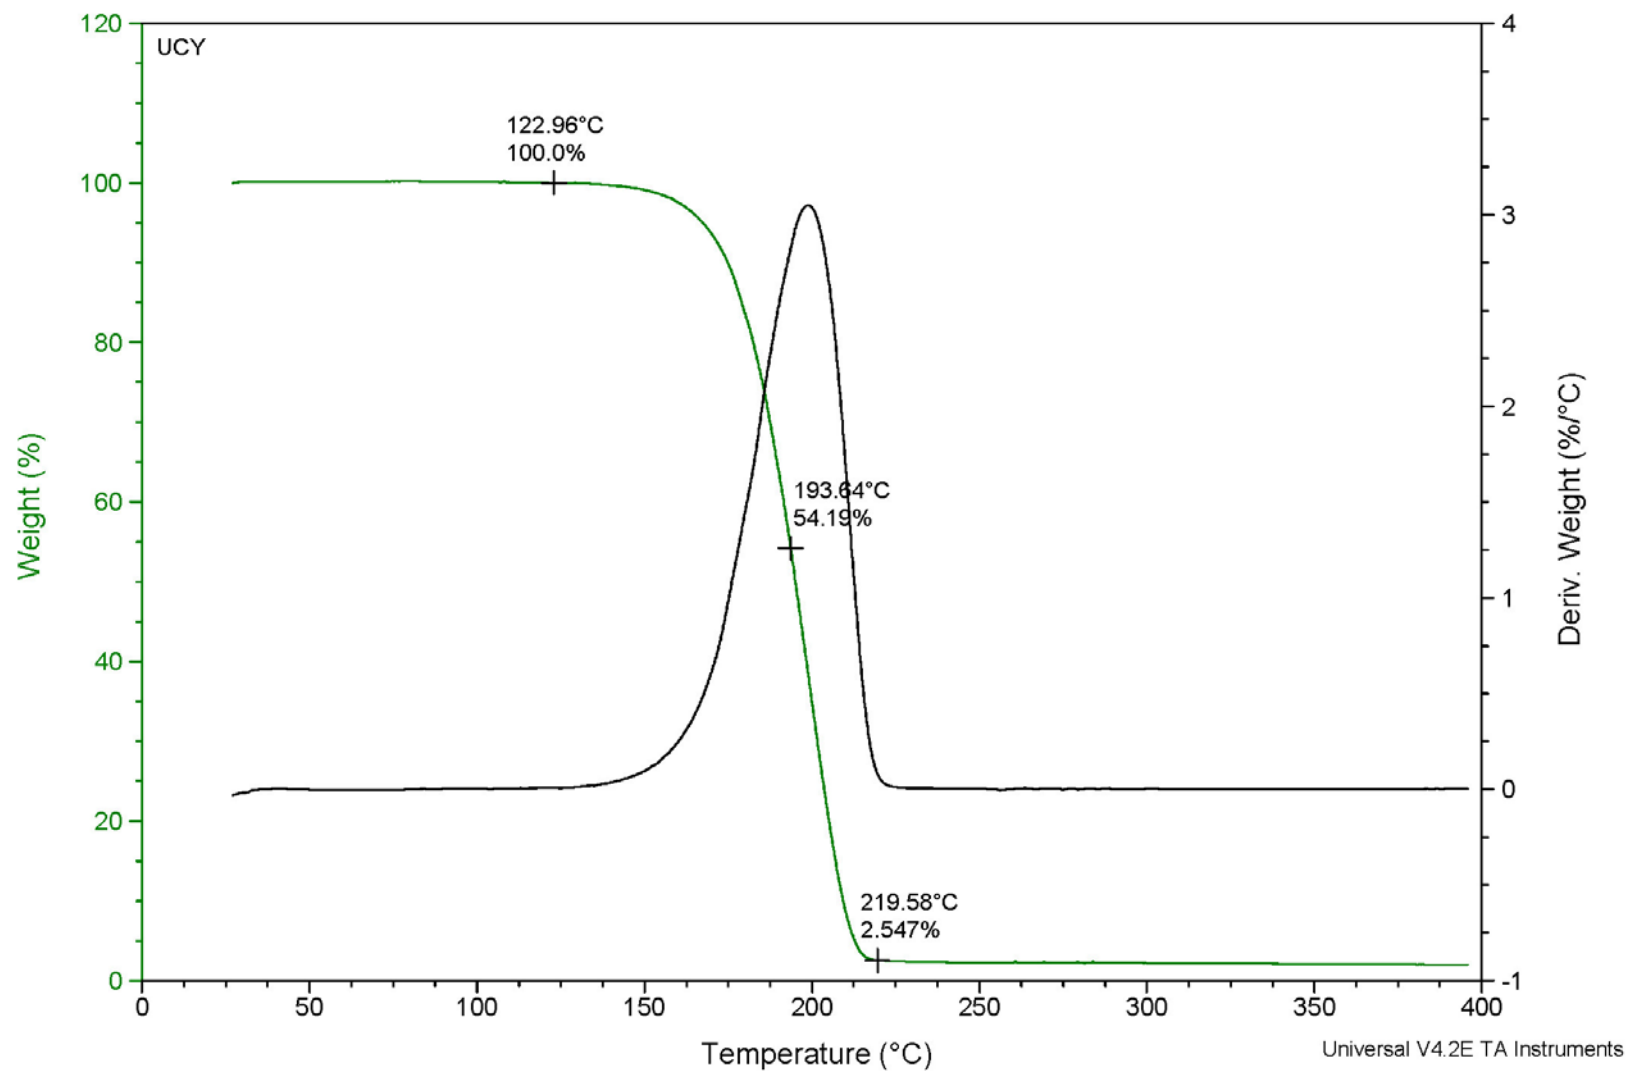

## 5. X-ray crystallographic information (crystal data/structure refinement) for 10 and 3

**Table S1:** Selected crystallographic data for compounds **10** and **3**

| Compound                                                                                                   | <b>10</b>                                        | <b>3</b>                                                       |
|------------------------------------------------------------------------------------------------------------|--------------------------------------------------|----------------------------------------------------------------|
| Chemical formula                                                                                           | C <sub>12</sub> H <sub>14</sub> O <sub>6</sub> S | C <sub>6</sub> H <sub>8</sub> Br <sub>2</sub> O <sub>2</sub> S |
| Formula Mass                                                                                               | 286.29                                           | 304.00                                                         |
| Crystal system                                                                                             | Monoclinic                                       | Triclinic                                                      |
| <i>a</i> /Å                                                                                                | 8.170(2)                                         | 9.330(5)                                                       |
| <i>b</i> /Å                                                                                                | 7.029(2)                                         | 9.624(5)                                                       |
| <i>c</i> /Å                                                                                                | 22.066(4)                                        | 12.480(5)                                                      |
| $\alpha$ /°                                                                                                | 90.00                                            | 70.661(5)                                                      |
| $\beta$ /°                                                                                                 | 97.99(2)                                         | 73.733(5)                                                      |
| $\gamma$ /°                                                                                                | 90.00                                            | 63.117(5)                                                      |
| Unit cell volume/Å <sup>3</sup>                                                                            | 1254.9(5)                                        | 931.7(8)                                                       |
| Temperature/K                                                                                              | 100(2)                                           | 100(2)                                                         |
| Space group                                                                                                | <i>P</i> 2 <sub>1</sub> / <i>n</i>               | <i>P</i> 1, $\bar{1}$                                          |
| No. of formula units per unit cell, <i>Z</i>                                                               | 4                                                | 4                                                              |
| Radiation type                                                                                             | Mo-K $\alpha$                                    | Mo-K $\alpha$                                                  |
| Absorption coefficient, $\mu$ /mm <sup>-1</sup>                                                            | 0.279                                            | 8.874                                                          |
| No. of reflections measured                                                                                | 6494                                             | 5407                                                           |
| No. of independent reflections                                                                             | 2213                                             | 3278                                                           |
| <i>R</i> <sub>int</sub>                                                                                    | 0.0914                                           | 0.0482                                                         |
| Final <i>R</i> <sub><i>I</i></sub> <sup><i>a</i></sup> values ( <i>I</i> > 2 $\sigma$ ( <i>I</i> ))        | 0.0802                                           | 0.0380                                                         |
| Final <i>wR</i> ( <i>F</i> <sup>2</sup> ) <sup><i>b</i></sup> values ( <i>I</i> > 2 $\sigma$ ( <i>I</i> )) | 0.1921                                           | 0.0714                                                         |
| Final <i>R</i> <sub><i>I</i></sub> <sup><i>a</i></sup> values (all data)                                   | 0.1190                                           | 0.0508                                                         |
| Final <i>wR</i> ( <i>F</i> <sup>2</sup> ) <sup><i>b</i></sup> values (all data)                            | 0.2191                                           | 0.0785                                                         |
| Goodness of fit on <i>F</i> <sup>2</sup>                                                                   | 0.994                                            | 0.966                                                          |

<sup>*a*</sup>  $R_I = \Sigma ||F_o| - |F_c|| / \Sigma |F_o|$ ; <sup>*b*</sup>  $wR = [\Sigma [w(F_o^2 - F_c^2)^2] / \Sigma [wF_o^2]^2]^{1/2}$ ,  $w = 1 / [\sigma^2(F_o^2) + (m \cdot p)^2 + n \cdot p]$ ,  $p = [\max(F_o^2, 0) + 2F_c^2, 0] / 3$ , and *m* and *n* are constants.

**6. Crystal packing and interactions in the crystal structure of 3**

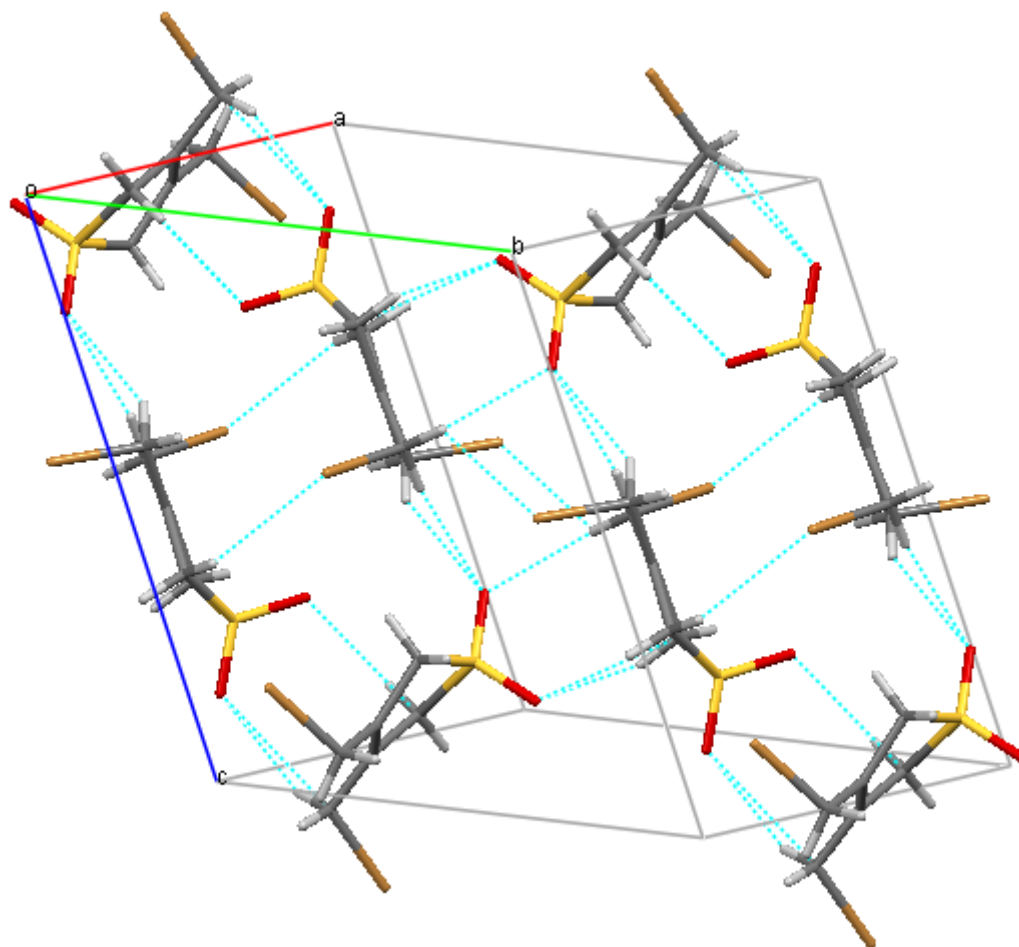

**Figure S1**

**7. Crystal packing and interactions in the crystal structure of 10**

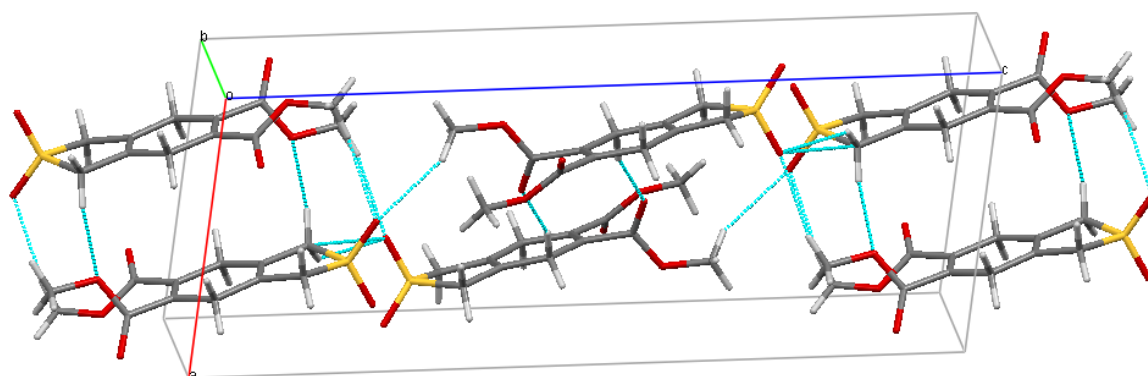

**Figure S2**

## 8. References

- (1) Oxford Diffraction (2008). CrysAlis CCD and CrysAlis RED, version 1.171.32.15, Oxford Diffraction Ltd, Abingdon, Oxford, England.
- (2) A. Altomare, G. Cascarano, C. Giacovazzo, A. Guagliardi, M. C. Burla, G. Polidori, and M. Camalli, "SIR92 - a program for automatic solution of crystal structures by direct methods," *J. Appl. Crystallogr.*, vol.27, p. 435, 1994.
- (3) G. M. Sheldrick, "SHELXL97-A program for the refinement of crystal structure", University of Göttingen, Germany.
- (4) L. J. Farrugia, "WinGX suite for single crystal small molecule crystallography", *J. Appl. Crystallogr.*, vol. 32, pp. 837-838, 1999.
- (5) C. F. Macrae, P. R. Edgington, P. McCabe, E. Pidcock, G. P. Shields, R. Taylor, M. Towler and J. van De Streek, *J. Appl. Crystallogr.*, 2006, **39**, 453.
